# 1 **Diverse pathogens activate the host RIDD pathway to subvert BLOS1-directed** 2 **immune defense**

3  
4 Kelsey Wells<sup>1,13</sup>, Kai He<sup>2,13</sup>, Aseem Pandey<sup>1,3</sup>, Ana Cabello<sup>1,3</sup>, Dong-Mei Zhang<sup>1</sup>, Jing Yang<sup>1</sup>, Gabriel  
5 Gomez<sup>4</sup>, Yue Liu<sup>5</sup>, Hao-Wu Chang<sup>6</sup>, Xue-Qing Li, Hao Zhang<sup>6</sup>, Luciana Fachini da Costa<sup>3</sup>, Richard P.  
6 Metz<sup>7</sup>, Charles D. Johnson<sup>7</sup>, Cameron Martin<sup>8</sup>, Jill Skrobarczyk<sup>8</sup>, Luc R. Berghman<sup>8</sup>, Kristin Patrick<sup>1</sup>,  
7 Julian Leibowitz<sup>1</sup>, Allison Rice-Ficht<sup>9</sup>, Sing-Hoi Sze<sup>10</sup>, Xiaoning Qian<sup>2,11</sup>, Qing-Ming Qin<sup>5\*</sup>, Thomas A.  
8 Ficht<sup>3\*</sup>, Paul de Figueiredo<sup>1,3,12,14\*</sup>

9  
10 <sup>1</sup> Department of Microbial Pathogenesis and Immunology, College of Medicine, Texas A&M  
11 Health Science Center, Bryan, 77807, USA

12 <sup>2</sup> Department of Electrical and Computer Engineering, Texas A&M University, 77843, USA

13 <sup>3</sup> Department of Veterinary Pathobiology, College of Veterinary Medicine, Texas A&M  
14 University, College Station, Texas 77843, USA

15 <sup>4</sup> Texas A&M Veterinary Medical Diagnostic Laboratory, Texas A&M University, College  
16 Station, Texas 77843, USA

17 <sup>5</sup> College of Plant Sciences, Key Laboratory of Zoonosis Research, Ministry of Education, Jilin  
18 University, Changchun 130062, Jilin, China

19 <sup>6</sup> Key Laboratory of Symbolic Computation and Knowledge Engineering, Ministry of Education,  
20 College of Computer Science and Technology, Jilin University, Changchun, 130012, Jilin, China

21 <sup>7</sup> Department of Genomics and Bioinformatics Service, Texas A&M AgriLife Research, College  
22 Station, TX 77843, USA

23 <sup>8</sup> Department of Poultry Science, Texas A&M University, 77843, USA

24 <sup>9</sup> Department of Molecular and Cellular Medicine, College of Medicine, Texas A&M Health  
25 Science Center, College Station, Texas 77843, USA

26 <sup>10</sup> Department of Computer Science and Engineering, Dwight Look College of Engineering;  
27 Department of Biochemistry & Biophysics, Texas A&M University, College Station, Texas  
28 77843, USA

29 <sup>11</sup> TEES-AgriLife Center for Bioinformatics & Genomic Systems Engineering, Texas A&M  
30 University, College Station, Texas 77843, USA

31 <sup>12</sup> Norman Borlaug Center, Texas A&M University, College Station, Texas 77843, USA

32 <sup>13</sup> These authors contributed equally

33 <sup>14</sup> Lead contact

34  
35 \*Corresponding authors. Email:

36 [qm Qin@jlu.edu.cn](mailto:qm Qin@jlu.edu.cn) (Q.M.Q.), [tficht@cvm.tamu.edu](mailto:tficht@cvm.tamu.edu) (T.A.F.), [pjdefigueiredo@tamu.edu](mailto:pjdefigueiredo@tamu.edu) (P.dF.)

37

38 Running title: Pathogens hijack host RIDD-BLOS1 pathway

1   **Abstract**

2

3   The phagocytosis and destruction of pathogens in lysosomes constitute central elements of innate  
4   immune defense. Here, we show that *Brucella*, the causative agent of brucellosis, the most prevalent  
5   bacterial zoonosis globally, subverts this immune defense pathway by activating regulated IRE1 $\alpha$ -  
6   dependent decay (RIDD) of mRNAs encoding BLOS1, a protein that promotes endosome-lysosome  
7   fusion. RIDD-deficient cells and mice harboring a RIDD-incompetent variant of IRE1 $\alpha$  were resistant  
8   to infection. Non-functional *Blos1* struggled to assemble the BLOC-1-related complex (BORC),  
9   resulting in differential recruitment of BORC-related lysosome trafficking components, perinuclear  
10   trafficking of *Brucella*-containing vacuoles (BCVs), and enhanced susceptibility to infection. The  
11   RIDD-resistant *Blos1* variant maintains the integrity of BORC and a higher-level association of  
12   BORC-related components that promote centrifugal lysosome trafficking, resulting in enhanced BCV  
13   peripheral trafficking and lysosomal-destruction, and resistance to infection. These findings  
14   demonstrate that host RIDD activity on BLOS1 regulates *Brucella* intracellular parasitism by  
15   disrupting BORC-directed lysosomal trafficking. Notably, coronavirus MHV also subverted the  
16   RIDD-BLOS1 axis to promote intracellular replication. Our work therefore establishes BLOS1 as a  
17   novel immune defense factor whose activity is hijacked by diverse pathogens.

18

19   **Keywords:** *Brucella*; coronavirus; regulated IRE1 $\alpha$ -dependent decay (RIDD); BLOS1; *Brucella*-  
20   containing vacuoles/lysosomes (BCVs); trafficking; intracellular parasitism

21  
22  
23  
24  
25  
26

## 1 INTRODUCTION

2 *Brucella* is an intracellular vacuolar pathogen that invades many cell and tissue types, including non-  
3 professional and professional phagocytes (de Figueiredo *et al*, 2015). Brucellosis has eluded  
4 systematic attempts at eradication for more than a century (Godfroid *et al*, 2002), and even in most  
5 developed countries, no approved human vaccine is available (Ficht & Adams, 2009). The  
6 intracellular lifestyle limits exposure to host innate and adaptive immune responses and sequesters  
7 the organism from the effects of some antibiotics. *Brucella* evades intracellular destruction by  
8 limiting interactions of the *Brucella*-containing vacuole (BCV) with the lysosomal compartment  
9 (Criscitiello *et al*, 2013; Pizarro-Cerda *et al*, 1998). BCVs harboring internalized *Brucella* traffic from  
10 endocytic compartments (eBCVs) to a replicative niche within vacuoles (rBCVs) that are decorated  
11 with markers of the endoplasmic reticulum (ER) (Pizarro-Cerda *et al.*, 1998; Starr *et al*, 2012). BCVs  
12 also accumulate autophagic membranes (aBCVs), which constitute a distinctive aspect of the  
13 intracellular lifestyle of the pathogen (Pandey *et al*, 2018; Starr *et al.*, 2012). The VirB type IV  
14 secretion system (T4SS) is a significant virulence factor that regulates *Brucella* intracellular  
15 trafficking (Marchesini *et al*, 2011; Paredes-Cervantes *et al*, 2011; Sa *et al*, 2012; Smith *et al*, 2012).  
16 *Brucella* effectors secreted by the T4SS promote bacterial intracellular trafficking and growth via  
17 modulation of host functions (de Barsy *et al*, 2011; De Jong *et al*, 2008; Dohmer Pisani *et al*, 2014;  
18 Miller *et al*, 2017; Myeni *et al*, 2013) and organisms that lack this system fail to establish productive  
19 infections.

20 The Unfolded Protein Response (UPR) is an evolutionarily conserved signaling pathway that allows  
21 the ER to recover from the accumulation of misfolded proteins (Gardner *et al*, 2013; Walter & Ron,  
22 2011) during ER stress. The UPR signals through the stress sensors IRE1 $\alpha$ , ATF6, and PERK located  
23 in the ER membrane. When the luminal domains of these proteins sense unfolded proteins, they  
24 transduce signals to their cytoplasmic domains, which initiate signaling that ultimately results in UPR  
25 (Lee *et al*, 2008). IRE1 $\alpha$  plays a central role in triggering UPR through an endonuclease/RNase  
26 activity in its cytoplasmic tail that catalyzes the splicing of *Xbp1* mRNA, which is then translated to  
27 generate the XBP1 transcription factor (Lee *et al.*, 2008; Ron & Walter, 2007). IRE1 $\alpha$  RNase activity  
28 can also cleave a wide variety of cellular mRNAs that leads to their degradation in a process termed  
29 regulated IRE1-dependent mRNA decay (RIDD) (Hollien & Weissman, 2006). The RIDD pathway  
30 displays selectivity. For example, the pathway cleaves a specific subset of mRNAs encoding

1 polypeptides destined for co-translational translocation into the ER lumen. The degradation of these  
2 mRNAs supports ER homeostasis by reducing the flux of non-essential polypeptides into the ER  
3 (Hollien & Weissman, 2006). The molecular targets of RIDD activity, and the physiological roles  
4 that this process plays in cells, remain areas of investigation.

5 *Brucella* infection induces host cell ER stress and activates host UPR (de Jong *et al*, 2013; Pandey *et*  
6 *al.*, 2018; Smith *et al*, 2013; Taguchi *et al*, 2015; Wang *et al*, 2016). The UPR sensor IRE1 $\alpha$ , but  
7 neither PERK nor ATF6, is required for the intracellular replication of the pathogen (Qin *et al*, 2008;  
8 Taguchi *et al.*, 2015), indicating that the IRE1 $\alpha$  signaling pathway confers susceptibility to host cell  
9 parasitism. An IRE1 $\alpha$ -ULK1 signaling axis also contributes to conferring susceptibility to *Brucella*  
10 intracellular replication; IRE1 $\alpha$ -directed activation of components of the host autophagy program  
11 promotes proper bacterial intracellular trafficking and replication (Pandey *et al.*, 2018). Despite the  
12 above-mentioned advances, our understanding of how the IRE1 $\alpha$ -RIDD axis and downstream  
13 processes regulate the intracellular lifestyle of *Brucella* remains largely unknown.

14 BLOS1 [biogenesis of lysosome-related organelles complex-1 (BLOC-1) subunit 1, also known as  
15 BLOC1S1/GCN5L1], a subunit of both the BLOC-1 and the BLOC-1-related complex (BORC),  
16 plays diverse roles in cells, including mitochondrial protein acetylation, modulation of metabolic  
17 pathways, and endosome-lysosome trafficking and fusion (Bae *et al*, 2019; Guardia *et al*, 2016; Pu *et*  
18 *al.*, 2017; Pu *et al*, 2015). In mammalian cells, BLOS1 has also been shown to be a principal target of  
19 RIDD activity (Bae *et al.*, 2019; Bright *et al*, 2015; Hollien *et al*, 2009) and is required for host cell  
20 cytotoxicity induced by Ebola virus (Carette *et al*, 2011). To date, the roles and mechanisms by which  
21 BLOS1 controls infection by intracellular pathogens remain largely unknown. Here, we demonstrate  
22 that IRE1 $\alpha$ -directed *Blos1* mRNA degradation confers susceptibility to *Brucella* infection. *Brucella*-  
23 induced RIDD activity suppresses *Blos1* expression, disassembles BORC components, and limits  
24 BLOS1-regulated interactions between BCVs and lysosomes. In addition, we show that murine  
25 hepatitis virus (MHV), a betacoronavirus, also subverts BLOS1 activity to promote its intracellular  
26 replication. Collectively, these activities promote the productive subcellular trafficking and  
27 intracellular replication of diverse pathogens. Our findings, therefore, identify BLOS1 as a novel  
28 immune defense factor that defends against bacterial and viral infection and show that *Brucella* and  
29 MHV subvert this innate immune defense system to promote disease.

1

## 2 **Results**

3

### 4 **IRE1 $\alpha$ conditional knockout (CKO, LysM-IRE1 $\alpha$ <sup>-/-</sup>) mice are resistant to *Brucella* infection**

5 *Brucella* induces host cell UPR during infection (Qin *et al.*, 2008; Taguchi *et al.*, 2015) and activates  
6 an IRE1 $\alpha$ -to-autophagy signaling axis in host cells to promote its intracellular lifestyle (Pandey *et al.*,  
7 2018). To extend these findings to an *in vivo* model of brucellosis, we tested the hypothesis that UPR  
8 and IRE1 $\alpha$  confer susceptibility to *Brucella* infection in mice harboring a conditional mutation in  
9 *Ern1*, the gene encoding IRE1 $\alpha$ . Because mice homozygous for null mutations in *Ern1* display  
10 embryonic lethality during organogenesis, we generated a control LysM-IRE1 $\alpha$ <sup>wt/wt</sup> [wt (wild-type)-  
11 IRE1 $\alpha$ ] and a IRE1 $\alpha$  CKO mouse line, LysM-IRE1 $\alpha$ <sup>mut/mut</sup> (m-IRE1 $\alpha$ ) (**Figure 1—figure**  
12 **supplement 1A**). In this line, exons 20-21 of the gene encoding IRE1 $\alpha$  were deleted in monocytes  
13 and macrophages, generating animals in which the endonuclease domain (and hence RIDD activity)  
14 was specifically disrupted. However, the kinase domain remained intact (Hur *et al.*, 2012; Iwawaki *et*  
15 *al.*, 2009). Macrophages are critical cellular targets for *Brucella* colonization (de Figueiredo *et al.*,  
16 2015). Hence, the tissue and molecular specificity of this lesion rendered the m-IRE1 $\alpha$  mouse an  
17 ideal system for investigating how bacterial activation of host RIDD activity controls intracellular  
18 parasitism by the virulent *B. melitensis* strain 16M (Bm16M).

19

20 After confirming the RNase activity deficiency of the truncated IRE1 $\alpha$  in bone marrow-derived  
21 macrophages (BMDMs) from m-IRE1 $\alpha$  animals (**Figure 1—figure supplement 1B**), we verified that  
22 m-IRE1 $\alpha$  mice had normal organ morphologies, fertility, growth, and development. In addition, we  
23 showed that these animals had similar B cell (B220<sup>+</sup>), T cell (CD4<sup>+</sup> or CD8<sup>+</sup>), and CD11b<sup>+</sup> profiles  
24 (**Figure 1—figure supplement 1C**). We also showed that the IL-1 $\beta$ , IL-6 and TNF- $\alpha$  responses of  
25 BMDMs to LPS stimulation were reduced in mutant mice (**Figure 1A-C**), consistent with previous  
26 findings that these LPS-mediated responses are controlled, in part, by IRE1 $\alpha$  activity (Martinon *et al.*,  
27 2010).

28 To determine whether IRE1 $\alpha$  activity in macrophages contributed to pathogen burden, dissemination,  
29 and disease progression, we infected wt-IRE1 $\alpha$  control and m-IRE1 $\alpha$  mice with Bm16M via the  
30 intraperitoneal route, humanely sacrificed the mice at various times post-infection, and then

1 determined the bacterial burden in assorted tissues by quantifying the number of recovered colony  
2 forming units (CFUs). We found that tissue-specific mutation of IRE1 $\alpha$  resulted in enhanced  
3 resistance to bacterial infection with significant reductions in bacterial load in the spleen and liver  
4 compared to wt-IRE1 $\alpha$  controls at 7 or 14 days post-infection (dpi), respectively (**Figure 1D-E**).  
5 However, both infected wt- and m-IRE1 $\alpha$  mice displayed similar spleen weights (**Figure 1—figure**  
6 **supplement 1D-E**) and spleen or liver inflammation (**Figure 1F-H**), revealing that the lower numbers  
7 of CFU recovered from m-IRE1 $\alpha$  animals were not accompanied by corresponding decreases in  
8 inflammation. To test the hypothesis that the differential bacterial burden in macrophage cells, the  
9 predominant cell type in which the pathogen resides and replicates *in vivo*, accounted for this  
10 reduction, we compared the bacterial load in CD11b<sup>+</sup> cells from control and m-IRE1 $\alpha$  mice that had  
11 been infected with Bm16M for seven days. We found that indeed CD11b<sup>+</sup> cells from the spleens of  
12 m-IRE1 $\alpha$  mice displayed striking reductions in bacterial load (**Figure 1I**), thereby suggesting that the  
13 resistance of these cells to intracellular parasitism contributed to the resistance phenotype observed  
14 at the organismal level. Divergent *Brucella* species display distinct host preferences; however, their  
15 interactions with host cells share common features (de Figueiredo *et al.*, 2015). To test the hypothesis  
16 that m-IRE1 $\alpha$  mice also displayed resistance to infection by other *Brucella* species, we infected these  
17 mice with *B. abortus* strain S2308 (BaS2308), a strain that displays tropism for cattle. We then  
18 assessed tissue burden in spleen and liver at 7 dpi. We found that m-IRE1 $\alpha$  mice also exhibited  
19 resistance to BaS2308 infection (**Figure 1J**), thereby indicating that the resistance phenotype of the  
20 mutant mice was not pathogen species-specific.

### 21 **IRE1 $\alpha$ RNase activity confers susceptibility to *Brucella* infection**

22 *Xbp1* splicing was dramatically diminished in BMDMs from m-IRE1 $\alpha$  mice (**Figure 1—figure**  
23 **supplement 1B**), indicating that BMDMs from the m-IRE1 $\alpha$  mice carried the expected functional  
24 defects in IRE1 $\alpha$  RNase activity. We thus tested the hypothesis that IRE1 $\alpha$  RNase activity confers  
25 susceptibility to intracellular parasitism by Bm16M. First, we performed CFU assays of Bm16M  
26 infection of BMDMs from m-IRE1 $\alpha$  and control mice and found that the replication efficiency of  
27 Bm16M in m-IRE1 $\alpha$  BMDMs at 8, 24, and 48 h.p.i. was significantly lower than controls (**Figure**  
28 **1K**). Similar results were observed in control and IRE1 $\alpha$ <sup>-/-</sup> mouse embryonic fibroblasts (MEFs) (**Qin**  
29 **et al., 2008; Figure 1—figure supplement 2A-B**). Second, we observed fewer Bm16M were  
30 recovered from BMDMs or RAW264.7 macrophages treated with 4 $\mu$ 8C, a compound that specifically

1 antagonizes IRE1 $\alpha$  RNase activity while leaving its kinase activity intact (Cross *et al.*, 2012), than  
2 mock-treated controls (**Figure 1L-M**). These findings supported the hypothesis that IRE1 $\alpha$  RNase  
3 activity confers susceptibility to infection by regulating the intracellular trafficking and/or survival of  
4 the pathogen.

### 6 **IRE1 $\alpha$ regulation of Bm16M intracellular replication is XBP1-independent**

7 We performed additional experiments to interrogate the role of IRE1 $\alpha$  RNase activity in controlling  
8 *Brucella* infection. Two possibilities were explored: (1) IRE1 $\alpha$  catalyzed splicing of *Xbp1* transcripts,  
9 and downstream expression of XBP1-responsive genes, conferred susceptibility to Bm16M infection;  
10 or (2) IRE1 $\alpha$  catalyzed RIDD activity controlled this process. To determine whether *Xbp1* splicing  
11 was the reason, we examined the survival and intracellular replication of the pathogen in BMDMs  
12 harvested from LyzM- *Xbp1*<sup>-/-</sup> mice in which *Xbp1* was conditionally ablated from monocytes,  
13 macrophages, and granulocytes (henceforth,  $\Delta$ *Xbp1* mice) and found that Bm16M replicated similarly  
14 in  $\Delta$ *Xbp1* BMDMs and wt-*Xbp1* littermate controls (**Figure 1N**). Moreover, Bm16M displayed  
15 similar levels of liver and spleen colonization in  $\Delta$ *Xbp1* and wt-*Xbp1* mice (**Figure 1O-P**). These data  
16 suggested an XBP1-independent role for IRE1 $\alpha$  RNase activity in conferring susceptibility to  
17 Bm16M infection, thereby implicating RIDD as the sought-after activity (see below).

### 18 **IRE1 $\alpha$ activity regulates *Brucella* intracellular trafficking and replication**

19 To dissect the mechanism by which IRE1 $\alpha$  activity confers susceptibility to intracellular parasitism,  
20 we examined the intracellular trafficking and replication of Bm16M in BMDMs derived from m-  
21 IRE1 $\alpha$  mice. We observed that the expression level of IRE1 $\alpha$  was relatively unchanged during a time  
22 course (48 hr) of infection in both wt-IRE1 $\alpha$  BMDMs (**Figure 1Q-R**) and MEFs (**Figure 1—figure**  
23 **supplement 2C**). IRE1 $\alpha$  phosphorylation was enhanced over the same time course in wt-IRE1 $\alpha$   
24 BMDMs during Bm16M infection (**Figure 1S-T**). To assess the influence of host IRE1 $\alpha$  activity on  
25 the intracellular replication of the pathogen, we used gentamicin protection analysis (Qin *et al.*, 2008)  
26 to examine bacterial replication in BMDMs from control and m-IRE1 $\alpha$  mice, as well as in control  
27 and IRE1 $\alpha$ <sup>-/-</sup> MEFs. As expected, Bm16M replicated efficiently in wt-IRE1 $\alpha$  BMDMs and control  
28 MEFs; however, the replication efficiency was significantly diminished in m-IRE1 $\alpha$  BMDMs and  
29 IRE1 $\alpha$ <sup>-/-</sup> MEFs (**Figure 1K; Figure 1—figure supplement 2B**). To test whether IRE1 $\alpha$  regulates  
30 Bm16M intracellular trafficking, we used confocal immunofluorescence microscopy (CIM) to

1 analyze the localization of the pathogen in IRE1 $\alpha$ <sup>+/+</sup> and IRE1 $\alpha$ <sup>-/-</sup> MEFs, or m-IRE1 $\alpha$  and control  
2 BMDMs. In IRE1 $\alpha$  harboring controls, the pathogen transiently trafficked through early and late  
3 endosomes (EEA1<sup>+</sup> and M6PR<sup>+</sup> compartments, respectively) (**Figure 2A-D; Figure 2—figure**  
4 **supplement 1A-D**) before primarily accumulating (at 24 and 48 h.p.i.) in a replicative niche  
5 decorated with the ER marker calreticulin (**Figure 2E-F; Figure 2—figure supplement 1E and G**);  
6 however, in m-IRE1 $\alpha$  BMDMs or IRE1 $\alpha$ <sup>-/-</sup> MEF cells, Bm16M displayed reduced trafficking to  
7 calreticulin<sup>+</sup> compartments (**Figure 2E-F; Figure 2—figure supplement 1E and G**). Instead, the  
8 pathogen trafficked with greater efficiency to M6PR<sup>+</sup> late endosomes (at 12 h.p.i.) (**Figure 2B, D;**  
9 **Figure 2—figure supplement 1B and D**), and to LAMP1<sup>+</sup> or cathepsin D<sup>+</sup> lysosomes (at 24 and 48  
10 h.p.i.) (**Figure 2G-J; Figure 2—figure supplement 1F and H**). Our data, therefore, demonstrated  
11 that IRE $\alpha$  activity controls Bm16M intracellular replication, likely via regulation of BCV ER  
12 trafficking. These findings encouraged us to investigate the molecular mechanisms driving these  
13 phenomena.

#### 14 ***Brucella* infection down-regulates RIDD genes**

15 We were intrigued with the hypothesis that Bm16M subverts host RIDD activity to promote  
16 intracellular parasitism. First, since host UPR/IRE1 $\alpha$  RNase activity is induced by *Brucella* effectors  
17 secreted by the T4SS of the pathogen (de Jong *et al.*, 2013), we tested whether RIDD activity was  
18 dependent upon the *Brucella* T4SS. We found that induction of IRE1 $\alpha$  RNase activity occurred in a  
19 *Brucella* T4SS-dependent fashion (**Figure 3—figure supplement 1A**). Next, we performed RNA-  
20 seq analysis to define candidate host genes whose transcripts were subject to RIDD control during  
21 *Brucella* infection. Specifically, we used Bm16M to infect triplicate sets of BMDMs as follows: (1)  
22 solvent control-treated wt-IRE1 $\alpha$ , (2) 4 $\mu$ 8C-treated wt-IRE1 $\alpha$ , or (3) solvent control-treated m-  
23 IRE1 $\alpha$  (**Figure 3—figure supplement 1B**). At 4 or 24 h.p.i., we harvested host mRNA for RNA-seq  
24 analysis. Differential expression analysis was then performed to identify genes that were down-  
25 regulated following Bm16M infection of wt-IRE1 $\alpha$  cells but were unchanged or up-regulated in either  
26 infected, drug-treated cells, or infected, m-IRE1 $\alpha$  cells. Genes that displayed reduced expression ( $p$   
27  $< 0.05$ ) in response to infection at 4 and/or 24 h.p.i., and also whose infection-dependent reductions  
28 in expression were reversed upon treatment with 4 $\mu$ 8C, or in m-IRE1 $\alpha$  cells, were defined as  
29 candidate “RIDD genes”. This analysis resolved 847 candidate RIDD genes (**Figure 3A-C; Figure**  
30 **3—figure supplement 1C-F; Figure 3—figure supplement 2; Figure 3—Source Dataset 1**).



1 KEGG pathway and interaction network analyses revealed that most RIDD candidate genes were  
2 involved in cellular component organization and biogenesis, RNA metabolism, and oxidative  
3 phosphorylation (**Figure 3—figure supplement 2**).

4 We performed several experiments to validate candidate RIDD genes identified in the RNA-seq  
5 analysis. First, we used real-time quantitative reverse transcription-PCR (qRT-PCR) to measure the  
6 expression levels during infection of several candidate RIDD genes, including *Blos1*, *Cd300lf*, *Diras2*,  
7 and *Txnip* (**Figure 3A-C; Figure 3—Source Dataset 1**). We found that the expression of these genes  
8 was significantly lower in *Brucella* infected wt-IRE1 $\alpha$  cells than in m-IRE1 $\alpha$  cells (**Figure 3D-G**).  
9 Second, we examined whether similar reductions in expression of candidate RIDD genes were  
10 observed in host cells infected with *B. abortus* S19 (BaS19, a vaccine strain). We found that BaS19  
11 induced similar phenotypes as Bm16M (**Figure 3—figure supplement 3A-C**), suggesting that the  
12 phenotype was not species-specific. Third, we used qRT-PCR to test the hypothesis that heat-killed  
13 bacteria induced similar changes in RIDD gene expression. We found that heat-killed bacteria did not  
14 cause a similar effect. Hence, the induction of RIDD activity in host cells required interactions with  
15 the viable agent (**Figure 3—figure supplement 3D**) and was also T4SS-dependent (**Figure 3—**  
16 **figure supplement 1A**). Fourth, we compared our list of candidate RIDD genes to genes previously  
17 reported to be subject to RIDD control (Bright *et al.*, 2015; Han *et al.*, 2009; Hollien *et al.*, 2009; So  
18 *et al.*, 2012). This comparison identified 40 genes that were previously shown to be substrates of  
19 IRE1 $\alpha$  RNase activity and/or displayed expression patterns consistent with RIDD targeting (**Figure**  
20 **3A-B**). Finally, we found that the expression of the key RIDD gene *Blos1* was also reduced in  $\Delta Xbp1$   
21 BMDMs infected with Bm16M, or when ER stress was induced in these cells (**Figure 3H**). These  
22 data suggested that the observed changes in host gene expression patterns were not a consequence of  
23 alterations in XBP1 transcription factor activity. Taken together, these data supported the hypotheses  
24 that (1) Bm16M infection induces RIDD activity in host cells, and (2) RIDD activity confers  
25 enhanced susceptibility to intracellular parasitism by *Brucella*. However, these findings left open the  
26 question of the molecular mechanism by which RIDD activity controlled Bm16M replication.

27

### 28 **RIDD activity on *Blos1* controls *Brucella* intracellular parasitism**

29 Our RNA-seq analysis identified *Blos1* as a *Brucella*-induced RIDD gene. However, the mechanisms  
30 by which *Blos1* regulates microbial infection are largely unknown. This fact encouraged us to test the

1 hypothesis that *Blos1* plays a central role in regulating Bm16M intracellular parasitism. First, we  
2 generated a cell line carrying a non-functional *Blos1* mutant allele (*mBlos1*). Mammalian BLOS1  
3 contains three conserved XAT hexapeptide-repeat motifs that are essential for acetyltransferase  
4 activity and may also be a necessary structure-defining feature for acetyl-CoA contact (Scott *et al*,  
5 2018; Wu *et al*, 2021a). Using CRISPR/cas9-mediated gene editing, we mutated the first XAT  
6 hexapeptide-repeat motif, which in the wild-type encodes “EALDVH,” and in the mutant encodes  
7 “EVVDH or EVDH” (**Figure 4—figure supplement 1A, Table S1**). A cell line containing gene  
8 encoding Cas9 and a non-specific gRNA was used as a control of the *mBlos1* mutant line. Second,  
9 we generated a RIDD-resistant *Blos1* cell line (henceforth *Rr-Blos1*). In this line, a mutation (from  
10 “G” to “U”) was introduced into *Blos1* mRNA stem-loop structure (i.e., the target of IRE1 $\alpha$  RNase  
11 activity) that rendered resistant cleavage by IRE1 $\alpha$  RNase. A *Blos1::Blos1-HA* line that  
12 overexpresses *Blos1* (wt-*Blos1*) served as a control of the *Rr-Blos1* cell line (**Figure 4—figure**  
13 **supplement 1B; Table S1**).

14  
15 We characterized the developed cell lines in several ways. First, we noted that  $\alpha$ -tubulin acetylation  
16 levels had been reported to be controlled, in part, by BLOS1 activity levels (Wu *et al*, 2018).  
17 Therefore, we monitored  $\alpha$ -tubulin acetylation to assess whether our developed cell lines did, in fact,  
18 display alterations in BLOS1 activity. We found that *mBlos1* and *Rr-Blos1* cells displayed reduced  
19 levels (**Figure 4A-B**) and maintained relatively higher levels (**Figure 4C-D**), respectively, of  
20 acetylated  $\alpha$ -tubulin, compared to their corresponding controls. These data supported the hypothesis  
21 that these cells had the expected levels of BLOS1 activity. Second, we tested the replication of the  
22 pathogen in different *Blos1* cell lines. We found that *mBlos1* cells exhibited increased susceptibility  
23 to Bm16M infection (**Figure 4E**), whereas *Rr-Blos1* cells or wild-type controls treated with 4 $\mu$ 8C  
24 supported dramatically reduced intracellular bacterial growth (**Figures 1M; 4F; Figure 4—figure**  
25 **supplement 1C**). Finally, we monitored the expression levels of BLOS1 protein during a 48 hr time  
26 course of infection. We found that BLOS1 expression was reduced at 16 h.p.i., and continuously  
27 decreased during Bm16M infection in wt-IRE1 $\alpha$  control cells; however, in m-IRE1 $\alpha$  BMDMs,  
28 BLOS1 expression was relatively stable or increased (at 48 h.p.i.) (**Figure 4G-H**). Similar results  
29 were observed in 4 $\mu$ 8C treated or untreated *mBlos1*, *Rr-Blos1*, and control cells infected with  
30 BaS2308 (**Figure 4—figure supplement 1D-E**). These data demonstrate that low or high BLOS1  
31 expression levels promote or impair *Brucella* infection, respectively.

## 1 **BLOS1 regulates *Brucella* intracellular trafficking**

2 The mechanism by which BLOS1 regulates *Brucella* infection was unknown. However, the observed  
3 subcellular trafficking defect of the pathogen in host cells harboring mutant or deficient variants of  
4 IRE $\alpha$  (**Figure 2; Figure 2—figure supplement 1**) suggested that BLOS1 may control the  
5 intracellular parasitism of the pathogen by regulating its subcellular trafficking. To illuminate this  
6 aspect, we treated *mBlos1*, *Rr-Blos1*, and the corresponding control cell lines with tunicamycin (Tm,  
7 an UPR inducer) or 4 $\mu$ 8C, or infected them with Bm16M. We then assessed the trafficking of the  
8 pathogen in these cells using CIM. We found that low levels of BLOS1 or non-functional BLOS1 in  
9 uninfected or infected cells were associated with the accumulation of late endosome/lysosome  
10 (LE/Lys) membranes in the vicinity of nuclei, reduced colocalization of latex beads with cathepsin  
11 D, and increased perinuclear LC3b index or autophagic activity near nuclei, in both control and Tm-  
12 treated conditions (**Figure 4—figure supplement 2A, C, E, G**). In these studies, the LC3b index was  
13 defined as: (Total number of identified cells with the ratio of the mean LC3b intensity in the  
14 cytoplasm to that in the nucleus <1)/(Total number of the analyzed cells).

15  
16 In contrast, overexpression of BLOS1 (the wild-type cells expressing wt-*Blos1* or *Rr-Blos1*) reduced  
17 LE/Lys perinuclear accumulation, increased the localization of latex beads in cathepsin D<sup>+</sup>  
18 compartments, and reduced perinuclear autophagic activity (**Figure 4—figure supplement 2B, D, F,**  
19 **H**). Although significant inhibition of BCV trafficking to lysosomes in the *mBlos1* cells was not  
20 observed at 24 and 48 h.p.i., the *mBlos1* cells supported enhanced BCV trafficking to ER  
21 compartments during bacterial infection, compared to that in the wild-type control cells, or 4 $\mu$ 8C-  
22 treated *mBlos1* cells (**Figure 4I-K**). In contrast, *Rr-Blos1* cells displayed reduced BCV trafficking to  
23 ER compartments, but instead promoted BCVs trafficking to lysosomes during Bm16M infection,  
24 compared to controls (**Figure 4L-N**).

25 To test the hypothesis that Bm16M infection alters the dynamics of associations between BLOS1 and  
26 BCVs, we used CIM approaches to localize these elements during a time course of infection after  
27 confirmation of the specificities of antibodies used in the work (see below) (**Figure 4—figure**  
28 **supplement 3A-D**). We found higher levels of BLOS1 colocalization with BCVs in 4 $\mu$ 8C-treated  
29 control or *mBlos1* cells than their corresponding untreated cells (**Figure 4O**); moreover, at 24 h.p.i.,  
30 lower levels of BLOS1<sup>+</sup> BCVs were observed in *mBlos1* cells compared to wild-type controls (**Figure**

1 **4—figure supplement 3E-F**). Rr-*Blos1* and/or 4 $\mu$ 8C inhibition of *Blos1* degradation in host cells  
2 (i.e., Rr-*Blos1*, 4 $\mu$ 8C-treated wt-*Blos1* control or Rr-*Blos1* cells) significantly promoted BLOS1+  
3 BCVs compared to the wt-*Blos1* control (**Figure 4O**, **Figure 4—figure supplement 3E-F**). These  
4 findings demonstrated that non-functional BLOS1 promoted the trafficking of the pathogen from  
5 LE/Lys membranes to the ER. However, Rr-*Blos1* cells (or 4 $\mu$ 8C treated cells) promoted the  
6 trafficking and degradation of the pathogen in lysosomes.

7

#### 8 **Disassembly of BORC promotes BCV trafficking to and accumulation in the ER**

9 To test whether BORC-related lysosome trafficking components mediate BCV trafficking during  
10 infection, we analyzed the dynamics of the interaction of BCVs with LAMTOR1 (a central  
11 component of mTORC1), the small GTPase ARL8b, and kinesin KIF1b and KIF5b proteins during  
12 infection. During bacterial intracellular trafficking and replication, colocalization of BCVs with both  
13 LAMP1 and LAMTOR1, LAMP1, or LAMTOR1 decreased in control and m*Blos1* cells, whereas  
14 these interactions were observed at higher levels in cells harboring Rr-*Blos1* variants (**Figure 5A-B**,  
15 **E and G**; **Figure 5—figure supplement 1A-B**). Similarly, recruitment of ARL8b to BCVs and/or  
16 LAMP1 was reduced in control and m*Blos1* cells, which impaired their kinesin-dependent movement  
17 toward the cell periphery; however, these interactions were maintained in Rr-*Blos1* cells (**Figure 5C-**  
18 **D, F and H**; **Figure 5—figure supplement 1C-D**). BCV interactions with KIF1b+ or KIF5b+, which  
19 preferentially drive lysosomes on peripheral tracks or perinuclear/ER tracks (Guardia *et al.*, 2016),  
20 decreased (**Figure 6A-B, E and G**; **Figure 6—figure supplement 1A-B**) or increased (**Figure 6C-**  
21 **D, F and H**; **Figure 6—figure supplement 1C-D**), respectively, in control, m*Blos1*, and wt-*Blos1*  
22 cells; however, the opposite phenomena were observed in Rr-*Blos1* cells (**Figure 6**; **Figure 6—figure**  
23 **supplement 1**). These findings suggest that BORC-related lysosome trafficking components may  
24 regulate BCV perinuclear trafficking, fusion with ER membranes and subsequent bacterial replication.

25 BORC, a protein complex that contains three components (i.e., BLOS1, BLOS2, SNAPIN) shared  
26 with the BLOC-1 complex and five other proteins KXD1, C17orf59 (Lyspersin),  
27 LOH12CR1(Myrlysin), C10orf32 (Diaskedin), and MEF2BNB, plays a critical role in the regulation  
28 of lysosome positioning (Pu *et al.*, 2015). In HeLa cells, interference with BORC triggers LE/Lys  
29 trafficking to the cell center via dynein, resulting in a characteristic clustering of LE/Lys in  
30 perinuclear regions (Pu *et al.*, 2015). We hypothesized that degradation of *Blos1* mRNA by IRE1 $\alpha$

1 during *Brucella* infection interferes with BORC assembly, resulting in the alteration of recruitment  
2 or disassociation of BORC-related trafficking components, and increased LAMP1<sup>+</sup>-BCV perinuclear  
3 trafficking and fusion with the ER and/or macroautophagosome membranes. To test this hypothesis,  
4 we performed protein co-immunoprecipitation (Co-IP) assays to measure the association of BORC  
5 components with each other in *Brucella* infected or uninfected host cells. We found that in uninfected  
6 cells, BLOS1 interacted with protein components of BLOC-1 (PALLIDIN), BORC (KXD1), and  
7 both BLOC-1 and BORC (BLOS2, SNAPIN) (**Figure 7A and B**). Moreover, under this condition,  
8 BORC components localized with peripheral or cytosolic LE/Lys membranes (**Figure 5—figure**  
9 **supplement 1; Figure 6—figure supplement 1**). However, in *Brucella* infected cells, where *Blos1*  
10 mRNA was degraded and BLOS1 protein depletion was observed (**Figures 3D, H; 4G-H; Figure**  
11 **3—figure supplement 3A; Figure 4—figure supplement 1D-E**), physical interaction between  
12 BLOS1 and BORC component SNAPIN was reduced in control cells and difficult to detect in the  
13 *mBlos1* variants during intracellular trafficking and replication of the pathogen (48 h.p.i.) (**Figure**  
14 **7C-D**). In fact, interactions between LYSPERSIN and KXD1 in control cells were also only detected  
15 at early time points (2 h.p.i.), but not at later time points corresponding to intervals when bacterial  
16 intracellular trafficking and replication were expected to occur; these interactions were also hardly  
17 detected in infected cells expressing *mBlos1* variants at these time points (**Figure 7C and E**). The  
18 reduced interactions between BLOS1 and BORC component SNAPIN as well as LYSPERSIN and  
19 KXD1 may result from the disassembly of BORC when BLOS1 is degraded during *Brucella* infection  
20 (**Figure 7C-E**). In *Brucella* infected *Blos1* overexpressing (wt-*Blos1*) cells, substantial reductions in  
21 the interactions were also observed (**Figure 7F-G**). In the infected Rr-*Blos1* cells, the interaction was  
22 maintained at a relatively higher level (**Figure 7F-G**), suggesting that the BORC complex remains  
23 assembled. The integrity or disassociation of BORC was consistent with the interactions between  
24 BORC-related trafficking components and with the colocalization dynamics of BCVs with BLOS1,  
25 mTORC1/LAMP1, LAMP1/ARL8b, LAMP1/KIF1b or with LAMP1/KIF5b. These findings were  
26 also consistent with BCV peripheral or perinuclear/ER trafficking and accumulation (**Figure 5-6;**  
27 **Figure 4—figure supplement 3E-F**). The results collectively suggested that the degradation of *Blos1*  
28 mRNA during pathogen infection resulted in the disassembly of BORC, which promoted BCV  
29 trafficking to and accumulation in the vicinities of nuclei and likely facilitated the fusion of BCVs  
30 with ER membranes in which bacteria replicated.

31

## 1 **Host RIDD activity on BLOS1 promotes coronavirus intracellular replication**

2 In light of the global COVID-19 pandemic, we tested whether RIDD-controlled BLOS1 activity is a  
3 target for subversion by coronaviruses. We infected control or host cells harboring alterations in this  
4 pathway with mouse hepatitis virus [MHV, a positive-strand RNA virus classified as a member of  
5 the Betacoronavirus genus (CoV)]. Notably, previous studies have shown that MHV infection induces  
6 host cell UPR and activates IRE1 $\alpha$  RNase and *Xbp1* splicing (Bechill *et al.*, 2008), thereby suggesting  
7 the hypothesis that MHV infection of host cells activates RIDD activity. To test this hypothesis,  
8 *mBlos1* or control host cells were untreated or treated with 4 $\mu$ 8C. Next, these cells were infected with  
9 MHV for 24 hr. Virus plaque-forming units (PFU) and host *Blos1* expression were then measured.  
10 We found that viral PFUs were reduced in 4 $\mu$ 8C-treated cells. However, significantly increased PFU  
11 in *mBlos1* cells at 24 h.p.i. compared to controls was observed (**Figure 7H**). Expression levels of  
12 *Blos1* mRNA were dramatically reduced during infection (**Figure 7I**). Collectively, these findings  
13 suggested that coronavirus MHV, like *Brucella*, subverts the host RIDD pathway to promote  
14 intracellular infection.

15

## 16 **Discussion**

17 RIDD, a fundamental component of UPR in eukaryotic cells, cleaves a cohort of mRNAs encoding  
18 polypeptides that influence ER stress, thereby supporting the maintenance of ER homeostasis. In this  
19 report, we found that *Brucella* infection subverts UPR, in general (Pandey *et al.*, 2018; Qin *et al.*,  
20 2008; Smith *et al.*, 2013; Taguchi *et al.*, 2015), and RIDD activity on *Blos1*, in particular, to promote  
21 intracellular parasitism. BLOS1, encoded by RIDD gene *Blos1*, is a shared subunit of both BLOC-1  
22 and BORC complexes (Pu *et al.*, 2015). Mutation or a reduction in BLOS1 expression affects both  
23 BLOC-1 and BORC (**Figure 7A-H**). The BLOC-1 complex is mainly involved in endosomal  
24 maturation and endosome-lysosome trafficking and fusion (John Peter *et al.*, 2013; Pu *et al.*, 2015;  
25 Scott *et al.*, 2018). Our work does not rule out the possibility that the disassociation of BLOC-1 also  
26 affects *Brucella* intracellular parasitism, especially in the early stages of cellular infection.

27 Our findings support a stepwise working model by which *Brucella* subverts the host RIDD pathway  
28 to facilitate intracellular parasitism (**Figure 7J**). First, *Brucella* infection induces UPR in host cells,  
29 a process associated with activation of IRE1 $\alpha$  kinase (Pandey *et al.*, 2018; Taguchi *et al.*, 2015) and  
30 RNase activities (Smith *et al.*, 2013; this work). Second, degradation of the RIDD target *Blos1* by

1 IRE1 $\alpha$  RNase activity results in depletion of BLOS1 proteins and reduced association with BORC  
2 components (**Figures 3D; 4G-H; Fig 7A-H**). Third, these events drive the trafficking of BCVs to the  
3 ER and their perinuclear accumulation, mitigate further fusion of BCVs with cytosolic lysosomes,  
4 and limit BCV trafficking to LE/Lys in peripheral regions where these organelles possess enhanced  
5 degradative functions (**Figures 5-6; Figure 4—figure supplement 3E-F**). Finally, the accumulation  
6 of BCVs decorated with ER proteins increases due to the fusion of BCVs with ER membranes and/or  
7 with noncanonical macrophagosomes (Pandey *et al.*, 2018; Starr *et al.*, 2012; Taguchi *et al.*, 2015).  
8 These final events support the intracellular replication and cell-to-cell movement of the pathogen.

9 Several lines of evidence support the proposed mechanism. First, *Brucella* infection activates IRE1 $\alpha$   
10 RNase activity as evidenced by *Xbp1* mRNA splicing (**Figure 3—figure supplement 1A**). However,  
11 the intracellular replication of the pathogen is not impaired in *Xbp1* KO cells and mice (**Figure 1N-**  
12 **P**). These findings support the hypothesis that IRE1 $\alpha$  RNase activity is required for *Brucella* infection  
13 in an IRE1 $\alpha$ -XBP1 independent fashion. Second, in addition to splicing *Xbp1*, IRE1 $\alpha$  cleaves other  
14 mRNAs, resulting in their RIDD-mediated decay (Bae *et al.*, 2019). We identified several mRNAs,  
15 including *Blos1* (**Figure 3A-C**), that contain predicted stem-loop structures that were inferred to be  
16 targets of IRE1 $\alpha$  RNase activity (Moore & Hollien, 2015). The expression of these mRNAs was  
17 downregulated in response to *Brucella* infection. Host cells harboring non-functional *Blos1* mutants  
18 were highly susceptible to pathogen infection, whereas cells that express a RIDD-resistant *Blos1*  
19 variant were resistant to *Brucella* infection (**Figure 4E-F**).

20 Third, lysosome positioning regulated by BORC is a critical determinant of its functions. BORC  
21 associates peripherally with lysosomal membranes, where it recruits the small GTPase ARL8b to  
22 lysosomes. BORC and ARL8b promote lysosome movement by coupling to kinesin-1 (KIF5b) or  
23 kinesin-3 (KIF1b), which preferentially moves lysosomes on perinuclear tracks enriched in acetylated  
24  $\alpha$ -tubulin or on peripheral tracks enriched in tyrosinated  $\alpha$ -tubulin, respectively (Guardia *et al.*, 2016;  
25 Pu *et al.*, 2015). Interference with BORC or other components of this pathway drives lysosome  
26 trafficking to the cell center via dynein. Thus, cells lacking BORC display a perinuclear clustering of  
27 lysosomes (Pu *et al.*, 2015). Ragulator (a GEF for the Rag GTPases that signal amino acid levels to  
28 mTORC1) directly interacts with and inhibits BORC functions (Pu *et al.*, 2017). Building upon these  
29 observations, we show that *Brucella* infection results in *Blos1* degradation and disassembly of BORC;  
30 moreover, during *Brucella* intracellular trafficking and replication, colocalization of mTORC1,

1 ARL8b, and KIF1b with BCVs or lysosomes was reduced in control cells, and in cells expressing  
2 non-functional variants of BLOS1; however, KIF5b localization with BCVs or lysosomes was  
3 increased or in a higher level in these cells (**Figure 5, Figure 5—figure supplement 1; Figure 6,**  
4 **Figure 6—figure supplement 1**). Colocalization of the BORC-related lysosome trafficking factors  
5 (i.e., ARL8b, KIF1b, and mTORC1) with BCVs or lysosomes in cells expressing Rr-*Blos1* variants  
6 were maintained at a relatively higher level (**Figures 5-6**). These findings demonstrate that blocking  
7 BORC function via the disassembly of the BORC complex through depletion of *Blos1* by *Brucella*  
8 infection drives BCVs towards the perinuclear region and ER accumulation, which likely facilitates  
9 the fusion of BCVs with the ER, thereby supporting intracellular parasitism.

10 Finally, RIDD-mediated *Blos1* degradation may promote BCV fusion with autophagosomes.  
11 Nutrient-starved cells display perinuclear clustering of lysosomes, which influences autophagosome  
12 formation and autophagosome-lysosome fusion rates (Korolchuk *et al.*, 2011). Lysosome perinuclear  
13 clustering during starvation, ER stress induced by accumulation of misfolded proteins, drug  
14 treatments, and pathogen infection can disrupt metabolic homeostasis, thereby necessitating the  
15 induction of cell biological processes that return the cell to equilibrium. Macroautophagy and  
16 degradation of sequestered cytosolic materials by fusion of autophagosomes/macrophagosomes with  
17 lysosomes can promote the re-establishment of homeostasis (Bae *et al.*, 2019; Korolchuk *et al.*, 2011;  
18 Pu *et al.*, 2017). Degradation of *Blos1* mRNA by IRE1 $\alpha$  leads to the perinuclear accumulation of  
19 LE/Lys in response to ER stress in mouse cells. Overriding *Blos1* degradation results in ER stress  
20 sensitivity and the aggregation of ubiquitinated proteins. The independent perinuclear-trafficking and  
21 LE-associated endocytic transport promote the efficient degradation of these protein aggregates.  
22 Therefore, *Blos1* regulation via RIDD facilitates LE-mediated autophagy of protein aggregates,  
23 thereby promoting cell survival during stress (Bae *et al.*, 2019). Hepatocytes from *Blos1* liver-specific  
24 knockout (LKO) cells accumulate autolysosomes and lysosomes. In LKO hepatocytes, the initiation  
25 or extension of lysosomal tubules is abolished, which impairs autophagic lysosome reformation and  
26 results in the accumulation of enlarged autolysosomes (Wu *et al.*, 2021b). *Blos1* degradation by the  
27 RIDD pathway promotes BCV perinuclear or ER-region clustering, and may also avoid the peripheral  
28 movement of BCVs away from the ER region as a consequence of reduced  $\alpha$ -tubulin acetylation.  
29 These processes may facilitate BCV fusion with ER membranes or (macro)phagosomes, promote the



1 enlargement of aBCVs and further bacterial replication, and ultimately relieve *Brucella* induced ER  
2 stress (Pandey *et al.*, 2018; Qin *et al.*, 2008; Starr *et al.*, 2012; Taguchi *et al.*, 2015).

3 In addition to *Brucella*, the betacoronavirus MHV also subverts the RIDD-BLOS1 axis to promote  
4 intracellular replication (**Figure 7H-I**), thereby indicating that RIDD control of BLOS1 activity is  
5 not pathogen-specific. How the host RIDD-*Blos1* axis regulates interactions between host cells and  
6 coronaviruses merits further investigation. However, additional possibilities for regulatory control  
7 can be envisioned. First, coronaviruses utilize many proteins such as nsp1 to inhibit host protein  
8 synthesis in the first 6 hr of infection (Nakagawa & Makino, 2021). Second, BLOS1 contains a  
9 potential coronavirus 3C-like protease cleavage site, LQ<sup>^</sup>SAPS, near its C-terminus, thereby  
10 rendering it potentially susceptible to direct subversion by coronaviral pathogens. Finally,  
11 coronaviruses have evolved to subvert host interferon defenses (Thoms *et al.*, 2020), which may  
12 contribute to immune evasion. Future work will be directed toward examining these possibilities and  
13 the roles and mechanisms by which the RIDD-*Blos1* axis controls these and other host-pathogen  
14 interactions.

15

## 16 **Materials and Methods**

17

### 18 **Bacterial strains, cell culture, *Brucella* infection and antibiotic protection assays**

19 *Brucella melitensis* strain 16M (WT), and *B. abortus* strain 2308 (WT), and *B. abortus* vaccine strain  
20 S19 and other bacterial strains were used in this work. Bacteria were grown in tryptic soy broth (TSB)  
21 or on tryptic soy agar (TSA, Difco™) plates, supplemented with either kanamycin (Km, 50 µg/ml)  
22 or chloramphenicol (Cm, 25 µg/ml) when required. For infection, 4 ml of TSB was inoculated with  
23 a loop of bacteria taken from a single colony grown on a freshly streaked TSA plate. Cultures were  
24 then grown with shaking at 37°C overnight, or until OD<sub>600</sub>≈3.0.

25 Mammalian host cells including murine macrophages RAW264.7 and its derived non-functional and  
26 Rr-Blos1 variants and corresponding control cells, BMDMs, J774.A1 cells, MEFs and were routinely  
27 cultured at 37°C in a 5% CO<sub>2</sub> atmosphere in Dulbecco's Modified Eagle's Medium (DMEM)  
28 supplemented with 10% fetal bovine serum (FBS). Murine osteoblasts MC3T3-E1 and its derived  
29 Rr-Blos1 variant and corresponding control cells (generously provided by the Hollien Lab) were  
30 routinely cultured at 37°C in a 5% CO<sub>2</sub> atmosphere in alpha minimum essential media (MEMα) with

1 nucleosides, L-glutamine, and no ascorbic acids, supplemented with 10% FBS. Murine fibroblasts  
2 L2 cells were routinely cultured at 37°C in a 5% CO<sub>2</sub> atmosphere in F12 medium supplemented with  
3 10% fetal calf serum (FCS). For BMDMs, the above-mentioned DMEM with 20% L929 cell  
4 supernatant, 10% FBS, and antibiotics was used. Cells were seeded in 24-well or 96-well plates and  
5 cultured overnight before infection. For antibiotic protection assays, 1.25×10<sup>5</sup> (BMDMs) or  
6 2.5×10<sup>5</sup> (RAW264.7) host cells were seeded in each well; for fluorescence microscopy assays, 1×10<sup>4</sup>  
7 or 5×10<sup>4</sup> cells were seeded in 96-well plates or on 12-mm glass coverslips (Fisherbrand) placed on  
8 the bottom of 24-well microtiter plates respectively; for host RNA analysis, 1×10<sup>5</sup> host cells were  
9 seeded in each well of 24-well plates before infection. Host cells were infected with *Brucella* at an  
10 MOI of 100, unless otherwise indicated. Infected cells were then centrifugated for 5 min (200 × g)  
11 and incubated at 37°C. Thirty minutes to 1 hr post-infection, culture media was removed, and the  
12 cells were rinsed with 1 × phosphate buffered saline (PBS, pH 7.4). Fresh media supplemented with  
13 50 µg/ml gentamicin was then added for 1 hr to kill extracellular bacteria. Infected cells were  
14 continuously incubated in the antibiotic. At the indicated time points post infection, viable bacteria  
15 in infected cells were analyzed using the antibiotic protection assay or the immunofluorescence  
16 microscopy assay as previously described (Pandey *et al.*, 2018; Qin *et al.*, 2008).

17

### 18 **Viral propagation, infection, and plaque assay**

19 Wild type MHV-A59 was propagated in L2 cells in F12 media with 2% FCS. Host cells (RAW 264.7)  
20 were infected with MHV-A59 in triplicate at a MOI of 1. Infected cells were incubated at room  
21 temperature with gentle rocking for 1 hour. Afterwards, culture media was removed, and the cells  
22 were rinsed with 1× PBS (pH 7.4). Fresh media supplemented with 2% FBS was added. Infected  
23 host cells were incubated at 37°C. At the indicated time points post infection, viral supernatants were  
24 collected and then titrated by plaque assay on L2 cells at 33°C.

25

### 26 **Generation, genotyping and characterization of *Lysm-IRE1α*<sup>-/-</sup> mice**

27 Animal research was conducted under the auspices of approval by the Texas A & M University  
28 Institutional Animal Care and Use Committee in an Association for Assessment and Accreditation of  
29 Laboratory Animal Care International Accredited Animal Facility. To investigate the roles of IRE1α  
30 in controlling Bm16M intracellular parasitism, *LysM-IRE1α*<sup>-/-</sup> [IRE1α Conditional KO (CKO) mice  
31 were generated by breeding mice, in which exon 20-21 was floxed (Iwawaki *et al.*, 2009) with

1 lysozyme M (LysM) transgenic mice (Jackson Laboratories, Inc.). In the resultant animals, exon 20-  
2 21 of the IRE1 $\alpha$  gene was specifically deleted in myeloid cells, including macrophages, monocytes,  
3 and neutrophils. The CKO mice were genotyped using genomic DNA from tail vein to show the  
4 presence of cre alleles (Iwawaki *et al.*, 2009). Western blot analysis using anti-IRE1 $\alpha$  antibodies  
5 (Novus Biologicals) and *Xbp1* splicing were performed on BMDMs from CKO and control mice to  
6 validate the absence of full-length IRE1 $\alpha$  in CKO mice.

7

### 8 **BMDM harvest and cultivation**

9 BMDMs collected from the femurs of IRE1 $\alpha$  CKO and control mice were cultivated in L929-cell  
10 conditioned media [DMEM medium containing 20% L929 cell supernatant, 10% (v/v) FBS,  
11 penicillin (100 U/ml) and streptomycin (100 U/ml)]. After 3 days of culture, non-adherent precursors  
12 were washed away, and the retained cells were propagated in fresh L929-cell conditioned media for  
13 another 4 days. BMDMs were split in 24-well plates ( $2.5 \times 10^5$  cells/well) in L929-cell conditioned  
14 media and cultured at 37°C with 5% CO<sub>2</sub> overnight before use.

15

### 16 **Whole animal infections with *Brucella* and tissue analysis**

17 Mice from CKO and littermate control groups were intranasally infected with *B. melitensis* and *B.*  
18 *abortus* (Bm16M and BaS2038, respectively) with a dose of  $1 \times 10^6$  CFU. At 7 and 14 dpi, infected  
19 mice were euthanized, and the bacterial burden was assessed in spleen and liver. A portion of the  
20 tissue was fixed, and paraffin embedded for histopathological examination following H&E staining.  
21 To assess Bm16M tissue burden, spleen or liver tissues were homogenized and subjected to a serial  
22 dilution. Finally, the diluted tissue homogenates (200  $\mu$ l) were plated on TSA solid plates and CFUs  
23 were determined at 48 to 60 hr post incubation at 37°C in 5% CO<sub>2</sub>.

24

### 25 **Latex bead phagocytosis assays**

26 Phagocytosis assays for testing the phagocytic uptake and route of a substrate in the non-functional  
27 and RIDD resistant Blos1 variants in RAW264.7 murine macrophages were performed using the  
28 Phagocytosis Assay Kit (IgG FITC) (Cayman Chemical, USA) according to the manufacturer's  
29 instructions.

30

### 31 **RNA extraction and qRT-PCR analysis**

1 RNA was extracted from host cells per instructions in the RNeasy Mini Kit (74134 Qiagen).  
2 Complementary DNA was amplified from mRNA using the High-Capacity cDNA Reverse  
3 Transcription Kit (4368813 Applied Biosystems) per manufacturer's guidelines. For qRT-PCR of  
4 the macrophage infections of MHV strain A59, BaS19, Bm16M, or Ba2308 1/5 dilution of each  
5 cDNA was added into nuclease free water in a respective well in a 96-well plate. SYBR green (50 -  
6 90  $\mu$ l) with primers (5 - 9  $\mu$ l) were put into triplicate wells of each respective primer in the same  
7 respective 96-well plate for all experiments. Primers for *Blos1* and GAPDH were used (Table S2).  
8 The cDNA and master mix were transferred to a 384-well plate using E1 ClipTip pipettor (4672040  
9 Thermo Scientific). The qPR-PCR was run on a CFX384™ Real-Time System (Bio-Rad).

10

### 11 **RNA-seq analysis**

12 All RNA-seq reads were mapped to *Mus musculus* reference genome GRCm38.p4, release 84, which  
13 is provided by Ensembl.org, by using STAR-2.5.2a (Dobin *et al*, 2012). The aligned reads were then  
14 counted by using RSEM-1.2.29 (Li & Dewey, 2011). Differential Expression Analysis was performed  
15 by using DESeq-1.30.0 (Anders & Huber, 2010) and edgeR-3.26.6 (McCarthy *et al*, 2012; Robinson  
16 *et al*, 2010). Differentially expressed gene (DEGs) was determined if the gene's p-value (significance  
17 of differential expression) < 0.05 and the absolute value of the fold change > 1.5.

18

### 19 **Bioinformatic analysis**

20 KEGG enrichment pathway analysis was performed by using WebGestalt-2013 (WEB-based Gene  
21 Set Analysis Toolkit) (Wang *et al*, 2013) with RIDD genes. Gene Ontology (GO) Enrichment was  
22 performed by feeding the significantly differentially expressed genes (DEGs) to PANTHER-v7  
23 (Gaudet *et al*, 2011; Mi *et al*, 2010) in all three classes: Molecular Function, Biological Process and  
24 Cellular Component. Both KEGG pathway and GO enrichment analysis were filtered and sorted by  
25 Fisher test and Benjamini & Hochberg adjustment. The GeneCards website (Stelzer *et al*, 2016) was  
26 used to connect to the REFSEQ mRNAs from NCBI's GenBank. The FASTA option was chosen  
27 and the fasta file was saved. The fasta file was uploaded to RNAfold Web Server (Institute for  
28 Theoretical Chemistry at University of Vienna) with the fold algorithm options of minimum free  
29 energy and partition function and avoid isolated base pairs. The Forna option was then used to view  
30 the secondary structure and manually searched for a stem loop with NNNNNCNGNNGNNNNNN.  
31 Interaction network analysis of KEGG pathways and the RIDD genes ( $p < 0.05$ ) identified in this

1 work was visualized using Cytoscape (<https://cytoscape.org/>) as described previously (Zhao *et al*,  
2 2017).

3

#### 4 **Generation of non-functional and RIDD resistant *Blos1* variants in RAW264.7 murine** 5 **macrophages**

6 Non-functional *Blos1* variants in RAW264.7 murine macrophages were generated using a protocol  
7 previously described (Hoffpauir *et al*, 2020). One clone containing either an amino acid deletion  
8 substitution or deletion in one of the XAT regions of murine BLOS1 (**Figure S4E**) was selected. For  
9 generation of Rr-*Blos1* variant and its control (wt-*Blos1*) in RAW264.7 murine macrophages, RNA  
10 was first extracted using RNeasy Plus mini-kit. *Blos1* cDNA was generated from mRNA and cloned  
11 into pCR™ 2.1-TOPO vector. Site-directed mutagenesis was utilized to generate a g449t mutation  
12 into one of the *Blos1* plasmid clones (**Figure S4F**). Both the wild-type (WT) and mutated *Blos1*  
13 segments were removed from the pCR™ 2.1-TOPO vector and cloned into pE2n vectors. Gateway  
14 cloning was used to generate expression vectors pLenti-CMV-Hygro-DEST (w117-1)-*Blos1*-WT and  
15 pLenti-CMV-Hygro-DEST (w117-1)-*Blos1*-G449T. At every step post cDNA creation, plasmid  
16 amplification vectors were verified via sequencing. The plasmids were then transfected into Lenti-X  
17 cells with psPAX2 and VSVG packaging plasmids. The virus was collected at 24 and 48 hrs post-  
18 transfection and stored at -80°C. RAW264.7 cells were transduced with the virus and cells containing  
19 the wt- or Rr- *Blos1* expression cassette were selected using hygromycin B (500 µg/ml).

20

#### 21 **Drug treatments**

22 Host cells were coincubated in 24-well plates with tunicamycin or 4µ8C at the indicated  
23 concentrations. Cells were treated with drugs 1 hr before, and during, infection with the  
24 indicated *Brucella* strains and incubated at 37°C with 5% CO<sub>2</sub>. At the indicated time points post  
25 infection, the treated cells were fixed with 4% formaldehyde and stained for immunofluorescence  
26 analysis or lysed to perform CFU assay or for RNA extraction assays as described above. To  
27 investigate whether the drugs inhibit *Brucella* growth, the drugs were individually added  
28 to *Brucella* TSB cultures at 37°C and incubated for 1 and 72 hr. CFU plating was used to assess  
29 bacterial growth in the presence of drugs, and thereby to evaluate the potential inhibitory effects. Host  
30 cells in which drug treatment or *Brucella* infection induced no significant differences in viability and

1 membrane permeability as well as drugs that have no adversary effect on *Brucella* growth were used  
2 in the experiments reported in this work.

3

#### 4 **Confocal immunofluorescence microscopy assays**

5 Immunofluorescence microscopy staining and imaging methods to determine *Brucella* intracellular  
6 trafficking and colocalization of the bacteria and host BORC components in infected host cells were  
7 perform as previously described (Pandey *et al.*, 2017; Pandey *et al.*, 2018; Qin *et al.*, 2011; Qin *et al.*,  
8 2008) with minor modifications. Briefly, to visualize Bm16M intracellular trafficking, the indicated  
9 host cells ( $5.0 \times 10^4$  for 24-well plates and  $1 \times 10^4$  for 96-well plates) were seeded on 12-mm  
10 coverslips placed on the bottom of wells of 24-well plates or 96-well plates (without coverslip) and  
11 infected with Bm16M-GFP or Bm16M. At 0.5 (for 24-well plates) or 1 (for 96-well plates) h.p.i.,  
12 the infected cells were washed with  $1 \times$  PBS and fresh media containing 50  $\mu$ g/ml gentamicin was  
13 added to kill extracellular bacteria. At the indicated time points post infection, the infected cells were  
14 fixed with 4% formaldehyde at 4°C for overnight or for 20 minutes at 37°C before confocal  
15 fluorescence or immunofluorescence microscopy analysis was performed as previously described  
16 (Pandey *et al.*, 2017; Pandey *et al.*, 2018; Qin *et al.*, 2011; Qin *et al.*, 2008). The primary antibodies  
17 used were listed in the Key Resources Table. Samples were stained with Alexa Fluor 488-conjugated,  
18 Alexa Fluor 594-conjugated, and/or Alexa Fluor 647 secondary antibody (Invitrogen/Molecular  
19 Probes, 1:1,000). Acquisition of confocal images, and image processing and analyses were performed  
20 as previously described (Pandey *et al.*, 2017; Pandey *et al.*, 2018; Qin *et al.*, 2011; Qin *et al.*, 2008).

21 The BioTek Cytation 5 and Gen 5 software (version 3.05) were used to calculate perinuclear Lamp-  
22 1 index and autophagic flux. Specifically, for perinuclear Lamp-1 index, the area of the nucleus and  
23 average intensity for Lamp1 was measured, noted as  $A_N$  and  $Int_N$ , respectively. The area of the whole  
24 cell and the average intensity for Lamp1 was measured, noted as  $A_{WC}$  and  $Int_{WC}$ , respectively. Next  
25 the area of the cell 3 micrometers off from the nucleus and the average intensity for Lamp1 was  
26 measured, noted as  $A_C$  and  $Int_C$ , respectively. Then,  $Int_{WCN}$   
27 (Average intensity of Lamp1 in the whole cell minus nucleus) and  $Int_P$  (Average intensity of Lamp1  
28 in the perinuclear region) were calculated as the following formula:

$$29 \quad Int_{WCN} = ((A_{WC} \times Int_{WC}) - (A_N \times Int_N)) / (A_{WC} - A_N)$$

$$30 \quad Int_P = (((A_{WC} \times Int_{WC}) - (A_N \times Int_N)) - (A_C \times Int_C)) / ((A_{WC} - A_N) - A_C)$$

1 If  $\text{Int}_p/\text{Int}_{\text{WCN}} \leq 1$ , which means that there is no or very little perinuclear colocalization; If  
2  $\text{Int}_p/\text{Int}_{\text{WCN}} > 1$ , which means that there is perinuclear colocalization.

3 For autophagic activity, using BioTek Cytation 5 and Gen 5 software (version 3.05), the mean  
4 intensity of LC3b in the nucleus (M1) and in the cytoplasm (M2) were measured using a primary and  
5 secondary mask in every individual cell. In the Gen 5 software, a subpopulation analysis was carried  
6 out to identify cells that had a ratio of  $M2/M1 < 1$ . From this, the perinuclear LC3b index or  
7 autophagic activity was calculated as the following formula: Perinuclear LC3b index (or autophagic  
8 activity) = (Total number of identified cells with  $M2/M1 < 1$ )/Total number of the analyzed cells.

9  
10 For calculation of the BCV-BLOS1<sup>+</sup> index, the corrected total cell fluorescence was measured by  
11 taking the integrated density (area of cells × mean fluorescence), then the number of *Brucella* in each  
12 cell and colocalization of BLOS1 and Bm16M (BCV-BLOS1<sup>+</sup>, %) were counted. Cells that did not  
13 contain bacteria were removed from the calculation. The integrated density was divided by the  
14 number of bacteria in the cell to obtain the "Total fluorescence per bacteria". The "BCV-BLOS1<sup>+</sup>  
15 index" was then calculated by multiplying the "Total fluorescence per bacteria" with the  
16 colocalization percentage. Since BLOS1 protein is more stable in control cells treated with 4μ8C, the  
17 value of BCV-BLOS1<sup>+</sup> index was normalized as 100%.

18  
19 **Protein pull-down assays and immunoblotting analysis**

20 Pull-down assays for testing physical interaction of proteins were performed using the Pierce Co-  
21 Immunoprecipitation (Co-IP) Kit (Thermo Scientific, USA) according to the manufacturer's  
22 instructions. Preparation of protein samples and immunoblotting blot analysis were performed as  
23 described previously (Ding *et al.*, 2021; Pandey *et al.*, 2017; Pandey *et al.*, 2018; Qin *et al.*, 2011).  
24 Densitometry of blots was performed using the ImageJ (<http://rsbweb.nih.gov/ij/>) software package.  
25 All Westerns were performed in triplicate and representative findings are shown.

26  
27 **Statistical analysis**

28 All the quantitative data represent the mean ± standard error of mean (SEM) from at least three  
29 biologically independent experiments, unless otherwise indicated. The data from controls were  
30 normalized as 1 or 100% to easily compare results from different independent experiments. The

1 significance of the data was assessed using the Student's *t* test (for two experimental groups), 2-way  
2 ANOVA test with Holm-Sidak's multiple comparisons, or the Kruskal-Wallis test with Dunn's  
3 multiple comparison. For the RNA-seq results, Log<sub>2</sub> fold changes were calculated and results were  
4 screened to meet the threshold ( $|\log_2\text{FC (fold change)}| > 1, P < 0.05$ ) for selection. DEGs met the  
5 criteria and in UPRsome were included in the final lists.

6

### 7 **Key resources**

8 All key resources, including bacterial strains, mammalian cell lines, reagents, etc. used in this work  
9 are listed in [Table S3](#).

### 10 **Data availability**

11 All data are included in this article, [Supplemental Figures](#) and [Supplemental Datasets](#). Source  
12 Data files have been provided for Figures 1, 4 and 7.

13

14 **Expanded view** for this article is available online.

### 15 **Author Contributions**

16 P.dF., K.M.W. and Q.M.Q. conceived and designed the experiments; K.M.W., Q.M.Q., A.P., A.C.,  
17 D.Z., J.Y., G.G., F.L., A.L.C., H.Q.F. performed the experiments; K.H., S-H.S., X.Q., P.dF., Q.M.Q.,  
18 K.M.W. Y.L., H.W.C., X.Q.L., H.Z., A.P., and J.L. analyzed the data; P.dF., T.A.F., Q.M.Q., A.R.F.,  
19 K.H., S-H.S., X.Q., H.W.C., and H.Z. R.P.M., C.D.J., L.B., K.P. and J.L. contributed  
20 reagents/materials/analysis tools; P.dF., T.A.F. and Q.M.Q. supervised the work; Q.M.Q., P.dF. and  
21 K.M.W. wrote the manuscript.

### 22 **Acknowledgements**

23 The authors are grateful to Dr. Julie Hollien (University of Utah) for sharing key cell lines used in  
24 this study, to Drs. Christine McFarland, Jessica Bourquin, Todd Wisner and Susan Gater (Texas  
25 A&M) for key support, and to Drs Steve Fullwood and Kalika Landua (Nikon Instruments) for expert  
26 assistance with the microscopy analysis. This work is supported by the Texas A&M Clinical Science  
27 Translational Research Institute Pilot Grant CSTR2016-1, DARPA (HR001118A0025-FoF-FP-006),  
28 NIH (R21AI139738-01A1, 1R01AI141607-01A1, 1R21GM132705-01), the National Science  
29 Foundation (DBI 1532188, NSF0854684), the Bill Melinda Gates Foundation, and the Defense



1 Advanced Research Projects Agency (Agreement HR001118A0025-FoF-FP-006) to PdF; the  
2 National Natural Science Foundation of China (# 81371773) to QMQ. The National Institute of Child  
3 Health and Human Development [RHD084339] to TAF (in part). The National Science Foundation  
4 Grant 1553281 to XQ. The content of the information does not necessarily reflect the position or the  
5 policy of the Government, and no official endorsement should be inferred.

6 **Competing interests:** The authors declare that no competing interests exist.

7

## 8 **References**

- 9 Anders S, Huber W (2010) Differential expression analysis for sequence count data. *Nature Precedings*: 1-1
- 10 Bae D, Moore KA, Mella JM, Hayashi SY, Hollien J (2019) Degradation of Blos1 mRNA by IRE1 repositions  
11 lysosomes and protects cells from stress. *J Cell Biol* 218: 1118-1127
- 12 Bechill J, Chen Z, Brewer JW, Baker SC (2008) Coronavirus infection modulates the unfolded protein response and  
13 mediates sustained translational repression. *J Virol* 82: 4492-4501
- 14 Bright MD, Itzhak DN, Wardell CP, Morgan GJ, Davies FE (2015) Cleavage of BLOC1S1 mRNA by IRE1 is  
15 sequence specific, temporally separate from XBP1 splicing, and dispensable for cell viability under acute  
16 endoplasmic reticulum stress. *Molecular and cellular biology* 35: 2186-2202
- 17 Carette JE, Raaben M, Wong AC, Herbert AS, Obernosterer G, Mulherkar N, Kuehne AI, Kranzusch PJ, Griffin  
18 AM, Ruthel G *et al* (2011) Ebola virus entry requires the cholesterol transporter Niemann-Pick C1. *Nature* 477:  
19 340-343
- 20 Criscitiello MF, Dickman MB, Samuel JE, de Figueiredo P (2013) Tripping on acid: trans-kingdom perspectives on  
21 biological acids in immunity and pathogenesis. *PLoS Pathog* 9: e1003402
- 22 Cross BC, Bond PJ, Sadowski PG, Jha BK, Zak J, Goodman JM, Silverman RH, Neubert TA, Baxendale IR, Ron  
23 D *et al* (2012) The molecular basis for selective inhibition of unconventional mRNA splicing by an IRE1-binding  
24 small molecule. *Proc Natl Acad Sci U S A* 109: E869-878
- 25 de Barsey M, Jamet A, Filopon D, Nicolas C, Laloux G, Rual JF, Muller A, Twizere JC, Nkengfac B, Vandenhoute  
26 J (2011) Identification of a *Brucella* spp. secreted effector specifically interacting with human small GTPase  
27 Rab2. *Cellular microbiology* 13: 1044-1058
- 28 de Figueiredo P, Ficht TA, Rice-Ficht A, Rossetti CA, Adams LG (2015) Pathogenesis and Immunobiology of  
29 Brucellosis: Review of *Brucella*-Host Interactions. *The American journal of pathology* 185: 1505-1517
- 30 de Jong MF, Starr T, Winter MG, den Hartigh AB, Child R, Knodler LA, van Dijl JM, Celli J, Tsolis RM (2013)  
31 Sensing of bacterial type IV secretion via the unfolded protein response. *MBio* 4: e00418-00412
- 32 De Jong MF, Sun YH, Den Hartigh AB, Van Dijl JM, Tsolis RM (2008) Identification of VceA and VceC, two  
33 members of the VjbR regulon that are translocated into macrophages by the *Brucella* type IV secretion system.  
34 *Molecular microbiology* 70: 1378-1396
- 35 Ding S, Yang J, Feng X, Pandey A, Barhoumi R, Zhang D, Bell SL, Liu Y, da Costa LF, Rice-Ficht A (2021)  
36 Interactions between fungal hyaluronic acid and host CD44 promote internalization by recruiting host autophagy  
37 proteins to forming phagosomes. *IScience* 24: 102192
- 38 Dobin A, Davis CA, Schlesinger F, Drenkow J, Zaleski C, Jha S, Batut P, Chaisson M, Gingeras TR (2012) STAR:  
39 ultrafast universal RNA-seq aligner *Bioinformatics* 29: 15-21
- 40 Dohmer Pisani PH, Valguarnera PE, Czibener C, Ugalde JE (2014) Identification of a type IV secretion substrate  
41 of *Brucella abortus* that participates in the early stages of intracellular survival.
- 42 Ficht TA, Adams LG (2009) Brucellosis. In: *Vaccines for Biodefense and Emerging and Neglected Diseases*, Barrett  
43 A.D.T., Stanberry L.R. (eds.) p. 1488. Academic Press:

- 1 Gardner BM, Pincus D, Gotthardt K, Gallagher CM, Walter P (2013) Endoplasmic reticulum stress sensing in the  
2 unfolded protein response. *Cold Spring Harbor perspectives in biology* 5: a013169
- 3 Gaudet P, Livstone MS, Lewis SE, Thomas PD (2011) Phylogenetic-based propagation of functional annotations  
4 within the Gene Ontology consortium. *Briefings in bioinformatics* 12: 449--462
- 5 Godfroid J, Saegerman C, Wellemans V, Walravens K, Letesson JJ, Tibor A, Mc Millan A, Spencer S, Sanna M,  
6 Bakker D *et al* (2002) How to substantiate eradication of bovine brucellosis when aspecific serological reactions  
7 occur in the course of brucellosis testing. *Vet Microbiol* 90: 461-477
- 8 Guardia CM, Farias GG, Jia R, Pu J, Bonifacino JS (2016) BORC Functions Upstream of Kinesins 1 and 3 to  
9 Coordinate Regional Movement of Lysosomes along Different Microtubule Tracks. *Cell Rep* 17: 1950-1961
- 10 Han D, Lerner AG, Walle LV, Upton J-P, Xu W, Hagen A, Backes BJ, Oakes SA, Papa FR (2009) IRE1 $\alpha$  kinase  
11 activation modes control alternate endoribonuclease outputs to determine divergent cell fates. *Cell* 138: 562-575
- 12 Hoffpauir CT, Bell SL, West KO, Jing T, Wagner AR, Torres-Odio S, Cox JS, West AP, Li P, Patrick KL *et al*  
13 (2020) TRIM14 Is a Key Regulator of the Type I IFN Response during Mycobacterium tuberculosis Infection.  
14 *Journal of immunology*
- 15 Hollien J, Lin JH, Li H, Stevens N, Walter P, Weissman JS (2009) Regulated Ire1-dependent decay of messenger  
16 RNAs in mammalian cells. *J Cell Biol* 186: 323-331
- 17 Hollien J, Weissman JS (2006) Decay of endoplasmic reticulum-localized mRNAs during the unfolded protein  
18 response. *Science* 313: 104-107
- 19 Hur KY, So JS, Ruda V, Frank-Kamenetsky M, Fitzgerald K, Koteliensky V, Iwawaki T, Glimcher LH, Lee AH  
20 (2012) IRE1 $\alpha$  activation protects mice against acetaminophen-induced hepatotoxicity. *J Exp Med* 209: 307-  
21 318
- 22 Iwawaki T, Akai R, Yamanaka S, Kohno K (2009) Function of IRE1  $\alpha$  in the placenta is essential for placental  
23 development and embryonic viability. *Proceedings of the National Academy of Sciences of the United States of*  
24 *America* 106: 16657-16662
- 25 John Peter AT, Lachmann J, Rana M, Bunge M, Cabrera M, Ungermann C (2013) The BLOC-1 complex promotes  
26 endosomal maturation by recruiting the Rab5 GTPase-activating protein Msb3. *J Cell Biol* 201: 97-111
- 27 Korolchuk VI, Saiki S, Lichtenberg M, Siddiqi FH, Roberts EA, Imarisio S, Jahreiss L, Sarkar S, Futter M, Menzies  
28 FM *et al* (2011) Lysosomal positioning coordinates cellular nutrient responses. *Nat Cell Biol* 13: 453-460
- 29 Lee KP, Dey M, Neculai D, Cao C, Dever TE, Sicheri F (2008) Structure of the dual enzyme Ire1 reveals the basis  
30 for catalysis and regulation in nonconventional RNA splicing. *Cell* 132: 89-100
- 31 Li B, Dewey CN (2011) RSEM: accurate transcript quantification from RNA-Seq data with or without a reference  
32 genome. *BMC Bioinformatics* 12: 323
- 33 Marchesini MI, Herrmann CK, Salcedo SP, Gorvel JP, Comerci DJ (2011) In search of Brucella abortus type IV  
34 secretion substrates: screening and identification of four proteins translocated into host cells through VirB  
35 system. *Cell Microbiol* 13: 1261-1274
- 36 Martinon F, Chen X, Lee AH, Glimcher LH (2010) TLR activation of the transcription factor XBPI regulates innate  
37 immune responses in macrophages. *Nat Immunol* 11: 411-418
- 38 McCarthy DJ, Chen Y, Smyth GK (2012) Differential expression analysis of multifactor RNA-Seq experiments  
39 with respect to biological variation. *Nucleic Acids Research* 40: 4288-4297
- 40 Mi H, Dong Q, Muruganujan A, Gaudet P, Lewis S, Thomas PD (2010) PANTHER version 7: improved  
41 phylogenetic trees, orthologs and collaboration with the Gene Ontology Consortium. *Nucleic Acids Research*  
42 38: D204-D210
- 43 Miller CN, Smith EP, Cundiff JA, Knodler LA, Blackburn JB, Lupashin V, Celli J (2017) A Brucella type IV  
44 effector targets the COG tethering complex to remodel host secretory traffic and promote intracellular  
45 replication. *Cell host & microbe* 22: 317-329. e317
- 46 Moore K, Hollien J (2015) Ire1-mediated decay in mammalian cells relies on mRNA sequence, structure, and  
47 translational status. *Mol Biol Cell* 26: 2873-2884
- 48 Myeni S, Child R, Ng TW, Kupko III JJ, Wehrly TD, Porcella SF, Knodler LA, Celli J (2013) Brucella modulates  
49 secretory trafficking via multiple type IV secretion effector proteins. *PLoS pathogens* 9: e1003556

- 1 Nakagawa K, Makino S (2021) Mechanisms of Coronavirus Nsp1-Mediated Control of Host and Viral Gene  
2 Expression. *Cells* 10
- 3 Pandey A, Ding SL, Qin Q-M, Gupta R, Gomez G, Lin F, Feng X, da Costa LF, Chaki SP, Katepalli M (2017)  
4 Global Reprogramming of Host Kinase Signaling in Response to Fungal Infection. *Cell Host & Microbe* 21:  
5 637-649. e636
- 6 Pandey A, Lin F, Cabello AL, da Costa LF, Feng X, Feng H-Q, Zhang M-Z, Iwawaki T, Rice-Ficht A, Ficht TA  
7 (2018) Activation of host IRE1 $\alpha$ -dependent signaling axis contributes the intracellular parasitism of *Brucella*  
8 *melitensis*. *Frontiers in Cellular and Infection Microbiology* 8: 103
- 9 Paredes-Cervantes V, Flores-Mejia R, Moreno-Lafont MC, Lanz-Mendoza H, Tello-Lopez AT, Castillo-Vera J,  
10 Pando-Robles V, Hurtado-Sil G, Gonzalez-Gonzalez E, Rodriguez-Cortes O *et al* (2011) Comparative proteome  
11 analysis of *Brucella abortus* 2308 and its virB type IV secretion system mutant reveals new T4SS-related  
12 candidate proteins. *J Proteomics* 74: 2959-2971
- 13 Pizarro-Cerda J, Meresse S, Parton RG, van der Goot G, Sola-Landa A, Lopez-Goni I, Moreno E, Gorvel JP (1998)  
14 *Brucella abortus* transits through the autophagic pathway and replicates in the endoplasmic reticulum of  
15 nonprofessional phagocytes. *Infection and immunity* 66: 5711-5724
- 16 Pu J, Keren-Kaplan T, Bonifacino JS (2017) A Ragulator-BORC interaction controls lysosome positioning in  
17 response to amino acid availability. *J Cell Biol* 216: 4183-4197
- 18 Pu J, Schindler C, Jia R, Jarnik M, Backlund P, Bonifacino JS (2015) BORC, a multisubunit complex that regulates  
19 lysosome positioning. *Developmental cell* 33: 176-188
- 20 Qin Q-M, Luo J, Lin X, Pei J, Li L, Ficht TA, de Figueiredo P (2011) Functional analysis of host factors that mediate  
21 the intracellular lifestyle of *Cryptococcus neoformans*. *PLoS Pathog* 7: e1002078
- 22 Qin QM, Pei J, Ancona V, Shaw BD, Ficht TA, de Figueiredo P (2008) RNAi screen of endoplasmic reticulum-  
23 associated host factors reveals a role for IRE1 $\alpha$  in supporting *Brucella* replication. *PLoS Pathog* 4: e1000110
- 24 Robinson MD, McCarthy DJ, Smyth GK (2010) edgeR: a Bioconductor package for differential expression analysis  
25 of digital gene expression data. *Bioinformatics* 26: 139-140
- 26 Ron D, Walter P (2007) Signal integration in the endoplasmic reticulum unfolded protein response. *Nat Rev Mol*  
27 *Cell Biol* 8: 519-529
- 28 Sa JC, Silva TM, Costa EA, Silva AP, Tsohis RM, Paixao TA, Carvalho Neta AV, Santos RL (2012) The virB-  
29 encoded type IV secretion system is critical for establishment of infection and persistence of *Brucella ovis*  
30 infection in mice. *Vet Microbiol* 159: 130-140
- 31 Scott I, Wang L, Wu K, Thapa D, Sack MN (2018) GCN5L1/BLOS1 Links Acetylation, Organelle Remodeling,  
32 and Metabolism. *Trends Cell Biol* 28: 346-355
- 33 Smith JA, Khan M, Magnani DD, Harms JS, Durward M, Radhakrishnan GK, Liu Y-P, Splitter GA (2013) *Brucella*  
34 induces an unfolded protein response via TcpB that supports intracellular replication in macrophages. *PLoS*  
35 *Pathog* 9: e1003785
- 36 Smith MA, Coincon M, Paschos A, Jolicoeur B, Lavalley P, Sygusch J, Baron C (2012) Identification of the binding  
37 site of *Brucella* VirB8 interaction inhibitors. *Chem Biol* 19: 1041-1048
- 38 So J-S, Hur KY, Tarrío M, Ruda V, Frank-Kamenetsky M, Fitzgerald K, Koteliensky V, Lichtman AH, Iwawaki T,  
39 Glimcher LH (2012) Silencing of lipid metabolism genes through IRE1 $\alpha$ -mediated mRNA decay lowers plasma  
40 lipids in mice. *Cell metabolism* 16: 487-499
- 41 Starr T, Child R, Wehrly T, Hansen B, Hwang S, López-Otin C, Virgin H, Celli J (2012) Selective Subversion of  
42 Autophagy Complexes Facilitates Completion of the *Brucella* Intracellular Cycle. *Cell Host & Microbe* 11: 33
- 43 Stelzer G, Rosen N, Plaschkes I, Zimmerman S, Twik M, Fishilevich S, Stein T, Nudel R, Lieder I, Mazor Y *et al*  
44 (2016) The GeneCards suite: from gene data mining to disease genome sequence analyses. *Current protocols in*  
45 *bioinformatics* 54: 1--30
- 46 Taguchi Y, Imaoka K, Kataoka M, Uda A, Nakatsu D, Horii-Okazaki S, Kunishige R, Kano F, Murata M (2015)  
47 Yip1A, a novel host factor for the activation of the IRE1 pathway of the unfolded protein response during  
48 *Brucella* infection. *PLoS Pathog* 11: e1004747

- 1 Thoms M, Buschauer R, Ameismeier M, Koepke L, Denk T, Hirschenberger M, Kratzat H, Hayn M, Mackens-  
2 Kiani T, Cheng J *et al* (2020) Structural basis for translational shutdown and immune evasion by the Nsp1  
3 protein of SARS-CoV-2. *Science* 369: 1249-1255
- 4 Walter P, Ron D (2011) The unfolded protein response: from stress pathway to homeostatic regulation. *Science* 334:  
5 1081-1086
- 6 Wang J, Duncan D, Shi Z, Zhang B (2013) WEB-based GEne SeT AnaLysis Toolkit (WebGestalt): update 2013.  
7 *Nucleic Acids Research* 41: W77-W83
- 8 Wang X, Lin P, Li Y, Xiang C, Yin Y, Chen Z, Du Y, Zhou D, Jin Y, Wang A (2016) Brucella suis Vaccine Strain  
9 2 Induces Endoplasmic Reticulum Stress that Affects Intracellular Replication in Goat Trophoblast Cells In  
10 vitro. *Frontiers in Cellular & Infection Microbiology* 6: 19
- 11 Wu K, Scott I, Wang L, Thapa D, Sack MN (2021a) The emerging roles of GCN5L1 in mitochondrial and vacuolar  
12 organelle biology. *Biochim Biophys Acta Gene Regul Mech* 1864: 194598
- 13 Wu K, Seylani A, Wu J, Wu X, Bleck CKE, Sack MN (2021b) BLOC1S1/GCN5L1/BORCS1 is a critical mediator  
14 for the initiation of autolysosomal tubulation. *Autophagy*: 1-18
- 15 Wu K, Wang L, Chen Y, Pirooznia M, Singh K, Wälde S, Kehlenbach RH, Scott I, Gucek M, Sack MN (2018)  
16 GCN5L1 interacts with  $\alpha$ TAT1 and RanBP2 to regulate hepatic  $\alpha$ -tubulin acetylation and lysosome trafficking.  
17 *J Cell Sci* 131: jcs221036
- 18 Zhao X, Shen M, Jiang X, Shen W, Zhong Q, Yang Y, Tan Y, Agnello M, He X, Hu F (2017) Transcriptomic and  
19 metabolomics profiling of phage–host interactions between PHAGE PaP1 and Pseudomonas aeruginosa.  
20 *Frontiers in microbiology* 8: 548
- 21

# 1 Figures and Figure legends

2

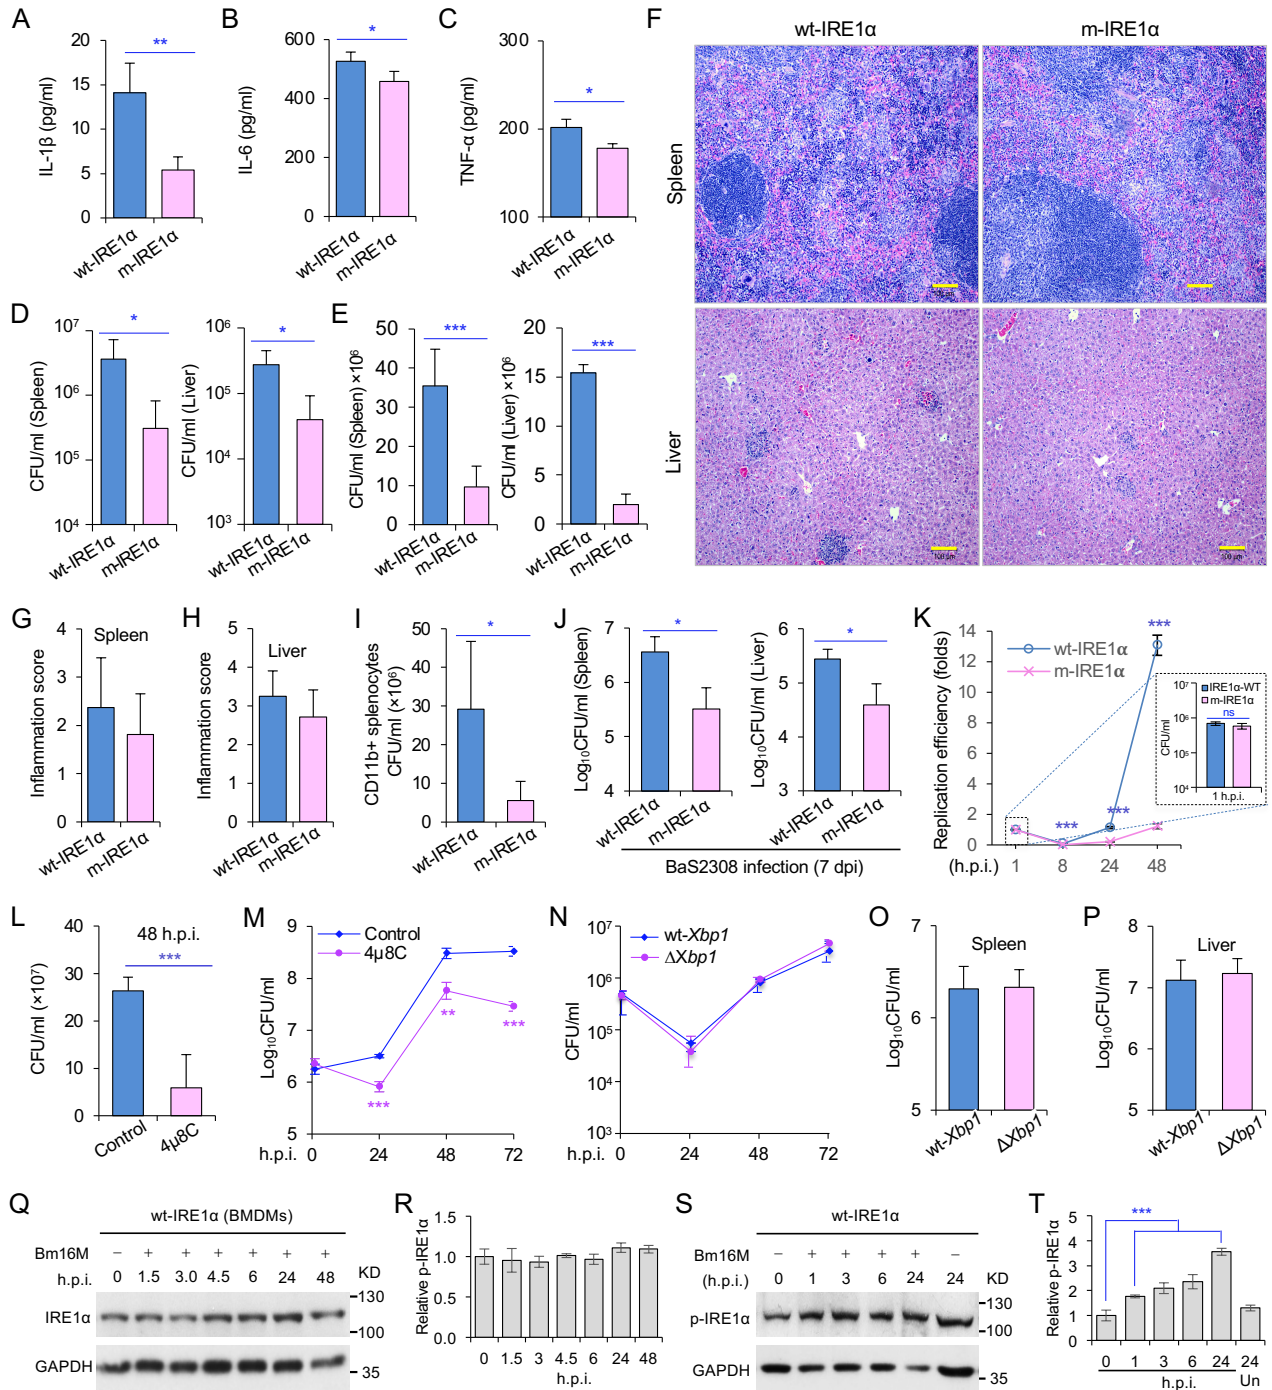

3

4 **Figure 1. Host IRE1α is required for *Brucella* infection *in vivo*.**

1 **Figure 1. Host IRE1 $\alpha$  is required for *Brucella* infection *in vivo*.** (A-C) Innate cytokine production  
2 of IL-1 $\beta$  (A), IL-6 (B), and TNF- $\alpha$  (C) in brow marrow derived macrophages (BMDMs) from the  
3 wild-type (WT, wt-IRE1 $\alpha$ ) control and *IRE1 $\alpha$*  conditional knockout (CKO, m-IRE1 $\alpha$ ) mice. (D, E)  
4 Colony-forming unit (CFU) assay for *B. melitensis* 16M (Bm16M) intracellular survival in spleens  
5 and livers of wt- and m-IRE1 $\alpha$  mice at 7 (D) or 14 (E) days post infection (dpi).(F) Histopathology  
6 of representative hematoxylin and eosin (H&E) stained sections of spleen and liver from Bm16M  
7 infected wt- and m-IRE1 $\alpha$  mice at 14 dpi. Bars: 100  $\mu$ m.(G, H) Quantification of inflammation of  
8 spleens (G) or livers (H) at 14 dpi.(I) CFU assays of CD11b<sup>+</sup> cells from Bm16M infected wt- or m-  
9 IRE1 $\alpha$  mice.(J) CFU assay for *B. abortus* S2308 (BaS2308) intracellular survival in spleens and livers  
10 in wt-IRE1 $\alpha$  control or m-IRE1 $\alpha$  mice at 7 dpi.(K) Bm16M invasion (right inset) and intracellular  
11 replication in BMDMs from m-IRE1 $\alpha$  and control mice. h.p.i.: hours post infection.(L, M) CFU  
12 assays of Bm16M infection of WT BMDMs (L) or RAW264.7 macrophages (M). Host cells were  
13 pretreated with 4 $\mu$ 8C (50  $\mu$ M) 1 hr before and during infection; CFUs of the infected cells were  
14 determined at the indicated h.p.i..(N) CFU assays for Bm16M infection of BMDMs from WT and  
15 *Xbp1* knockout ( $\Delta$ *Xbp1*) mice at the indicated h.p.i..(O, P) CFU assay for Bm16M intracellular  
16 survival in spleen (O) or liver (P) in WT or  $\Delta$ *Xbp1* mice at 14 dpi.(Q, R) Immunoblotting assay for  
17 IRE1 $\alpha$  expression (Q) and quantification of the expression levels (R) in BMDMs during a time course  
18 (48 hr) of Bm16M infection.(S, T) Bm16M infection induces phosphorylation of host IRE1 $\alpha$  (S) and  
19 quantification of the phosphorylated levels of IRE1 $\alpha$  during a time course (24 hr) of infection  
20 (T).Images/blots are representative of three independent experiments. Statistical data represent the  
21 mean  $\pm$  SEM (standard error of mean) from three independent experiments. \*, \*\*, \*\*\* indicates  
22 significance at  $p < 0.05$ , 0.01 and 0.001, respectively.

23  
24 **Figure 1—figure supplement 1.** Characterization of IRE1 $\alpha$  conditional knockout (CKO) and control  
25 mice.

26 **Figure 1—figure supplement 2.** IRE1 $\alpha$  is required for *B. melitensis* intracellular replication.

1

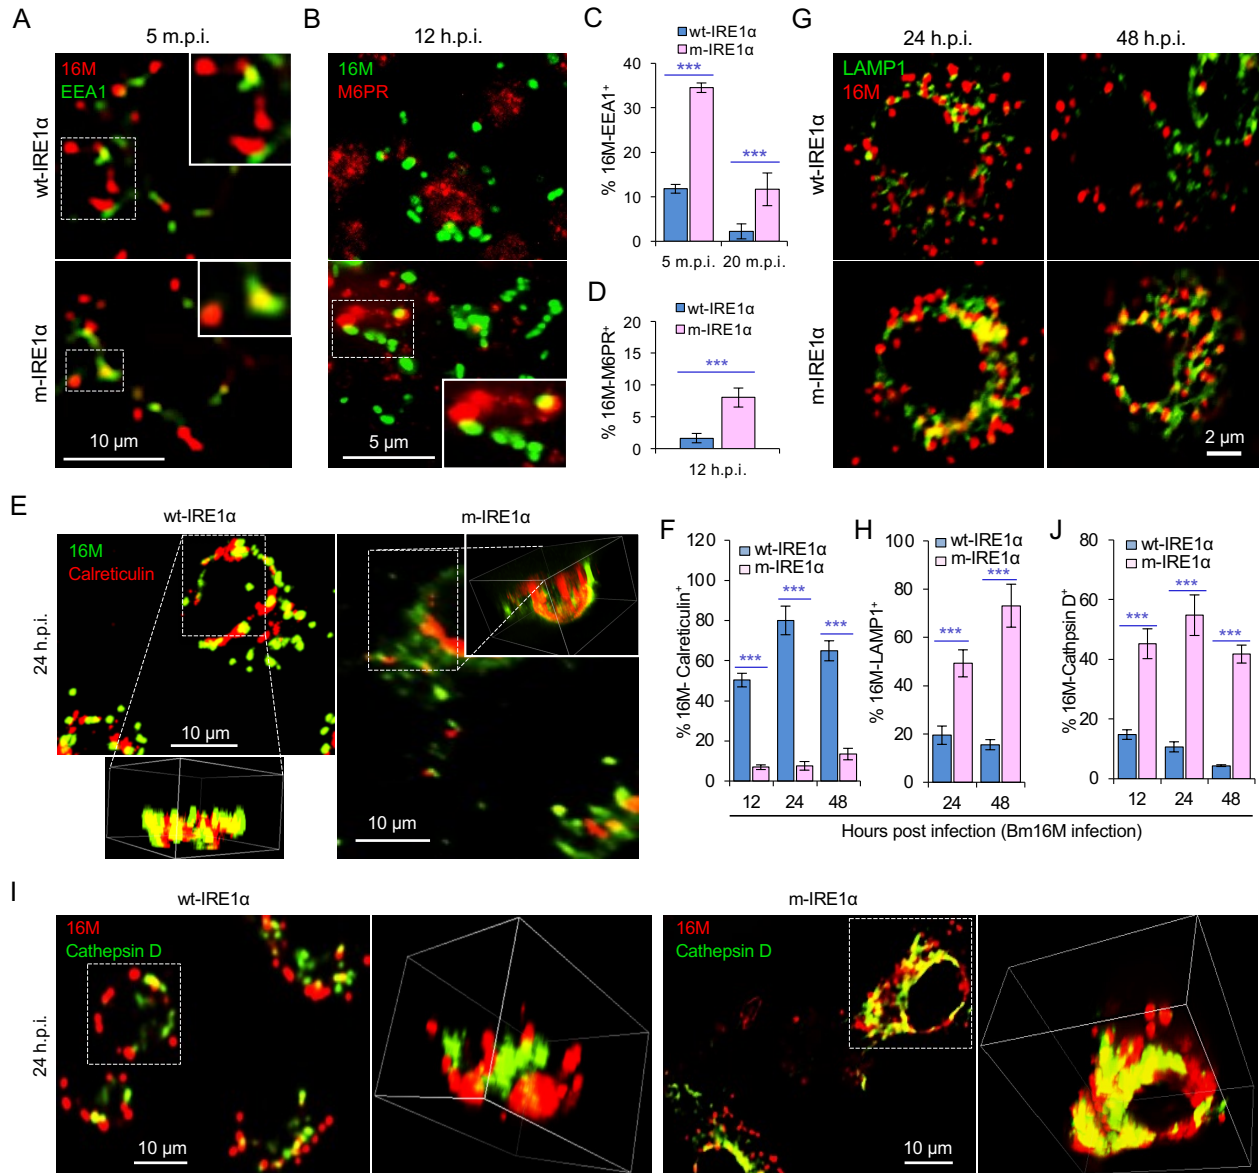

2  
3 **Figure 2. IRE1α regulates proper intracellular trafficking and replication of *Brucella* in a**  
4 **XBP1-independent fashion.**

1 **Figure 2. IRE1 $\alpha$  regulates proper intracellular trafficking and replication of *Brucella* in a**  
2 **XBP1-independent fashion.** (A, B) Colocalization analysis of Bm16M with host early endosomes  
3 (A) and late endosomes (B) of BMDMs from wt- and m-IRE1 $\alpha$  mice at the indicated time points  
4 post-infection. m.p.i.: minutes post infection. EEA1: early endosomal antigen 1; M6PR: mannose-6-  
5 phosphate receptor. (C, D) Quantification of Bm16M entry into early endosomes (C) or late  
6 endosomes (D) of the indicated host BMDMs at the indicated time points post-infection. (E, F)  
7 Colocalization analysis of Bm16M and the ER marker calreticulin (E), and quantification of Bm16M-  
8 calreticulin<sup>+</sup> (F) in wt- and m-IRE1 $\alpha$  BMDMs at the indicated h.p.i. (G-J) Colocalization of Bm16M  
9 and the lysosomal markers LAMP1 (G) or cathepsin D (I), and quantification of Bm16M-LAMP1<sup>+</sup>  
10 (H) or -cathepsin D<sup>+</sup> (J) in wt- and m-IRE1 $\alpha$  BMDMs at the indicated h.p.i.. Images are representative  
11 of three independent experiments. Statistical data express as mean  $\pm$  SEM from three independent  
12 experiments. \*\*\*,  $p < 0.001$ .  
13  
14 **Figure 2—figure supplement 1.** IRE1 $\alpha$  is required for *B. melitensis* properly intracellular trafficking.



1

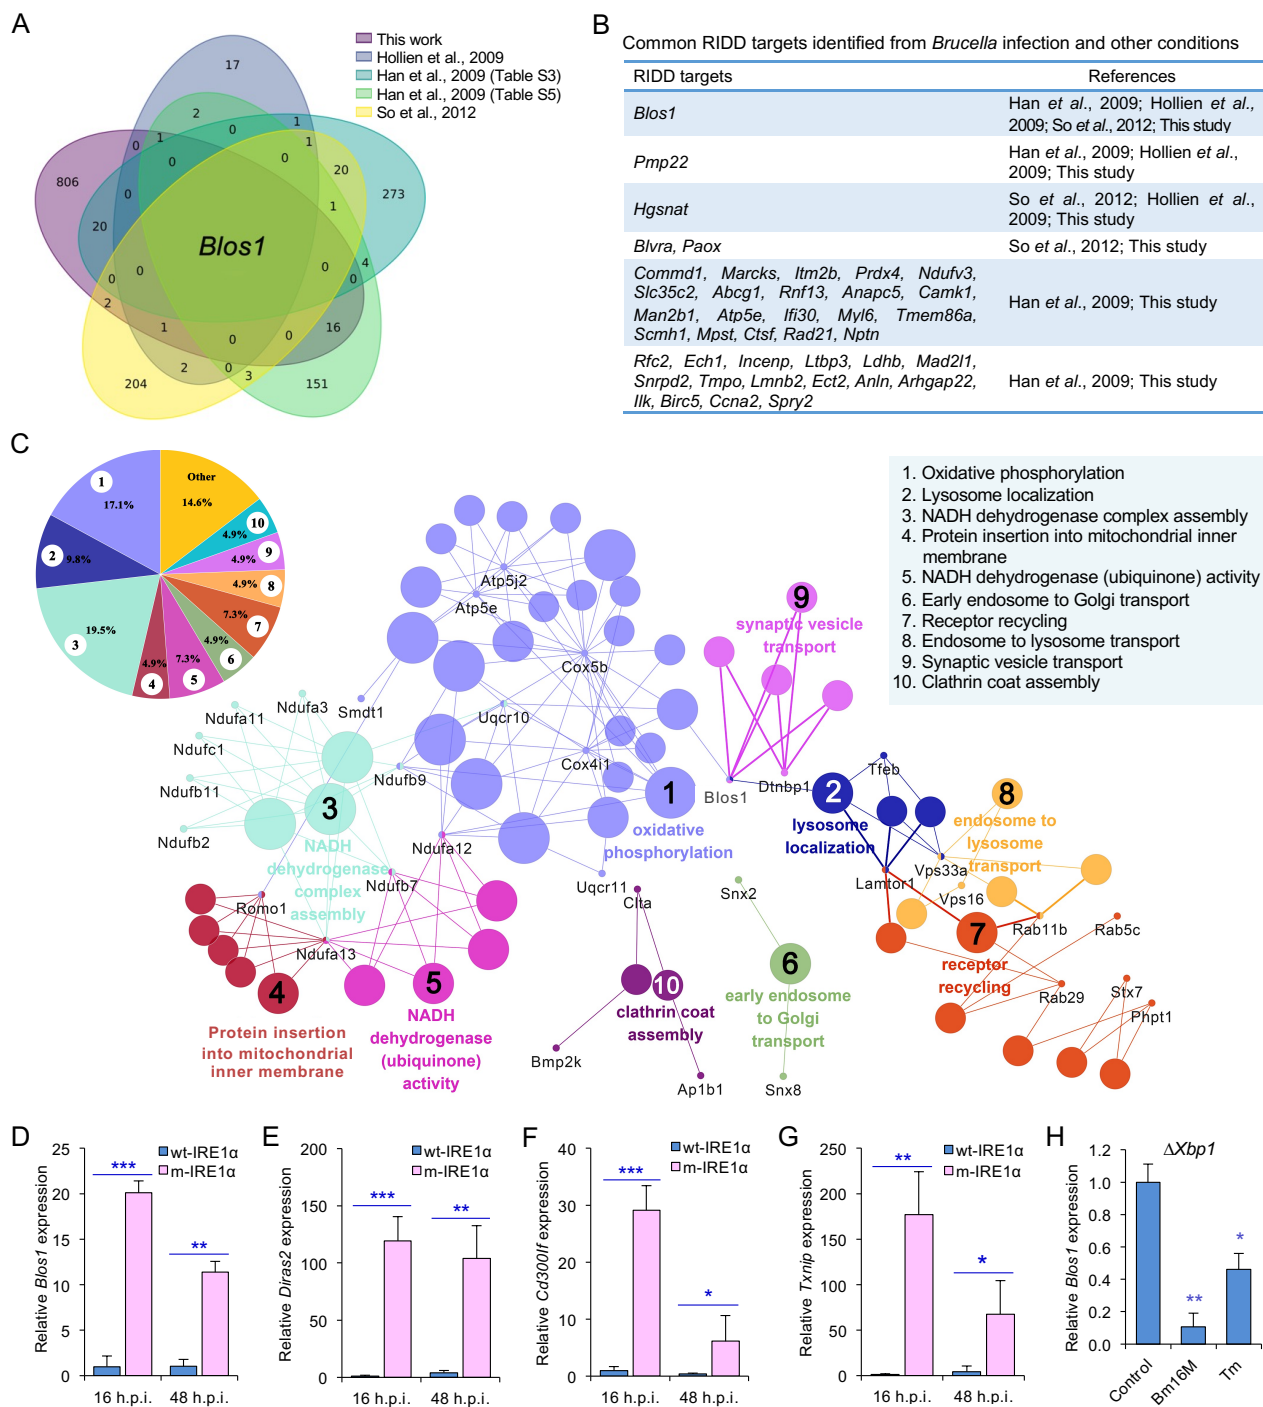

2  
3 **Figure 3. RIDD (regulated IRE1-dependent decay)-BLOS1 axis controls *Brucella* host cell**  
4 **infection.**

1 **Figure 3. RIDD (regulated IRE1-dependent decay)-BLOS1 axis controls *Brucella* host cell**  
2 **infection.** (A) Venn diagram showing numbers of candidate RIDD genes identified in the indicated  
3 data sets. (B) Common candidate RIDD genes identified in Bm16M-infected cells and other  
4 conditions in the indicated data sets. (C) Interaction network analysis of candidate RIDD genes (*Blos1*  
5 associated genes) identified in *Brucella* infected cells and the corresponding enriched KEGG  
6 pathways. Different pathways are distinguished by different colors. Interacting genes are shown with  
7 the smallest sized of dot with gene names. The upper-left-corner panel: enriched KEGG pathways  
8 and interacting candidate RIDD genes (%). (D-G) qRT-PCR validation of RIDD candidate genes  
9 *Blos1* (D), *Diras2* (E), *Cd300lf* (F), and *Txnip* (G) identified from RNA-seq analysis. Relative mRNA  
10 expression levels in potential RIDD targets from control and m-IRE1 $\alpha$  BMDMs infected with  
11 Bm16M at 16 and 48 h.p.i were measured by qRT-PCR. (H) qRT-PCR analysis of expression levels  
12 of *Blos1* in  $\Delta Xbp1$  BMDMs that were either uninfected (control), infected with Bm16M, or treated  
13 with tunicamycin (Tm, an UPR inducer, 5  $\mu$ g/ml) at 4 hr post infection/treatment. Expression levels  
14 of the indicated genes were normalized to GAPDH expression. Statistical data represent the mean  $\pm$   
15 SEM from three independent experiments. \*, \*\*, \*\*\*: significance at  $p < 0.05$ , 0.01 and 0.001,  
16 respectively.

17  
18 **Figure 3—figure supplement 1.** IRE1 $\alpha$  activation is *Brucella* Type 4 secretion system (T4SS)-  
19 dependent and gene profiling of host cells infected by *Brucella*.

20 **Figure 3—figure supplement 2.** KEGG pathway network analysis of the candidate RIDD genes  
21 identified via RNA-seq analysis from host cells infected or uninfected with Bm16M  
22 and/or treated or untreated with 4 $\mu$ 8C at 4 and/or 24 h.p.i..

23 **Figure 3—figure supplement 3.** Validation of RIDD target genes.

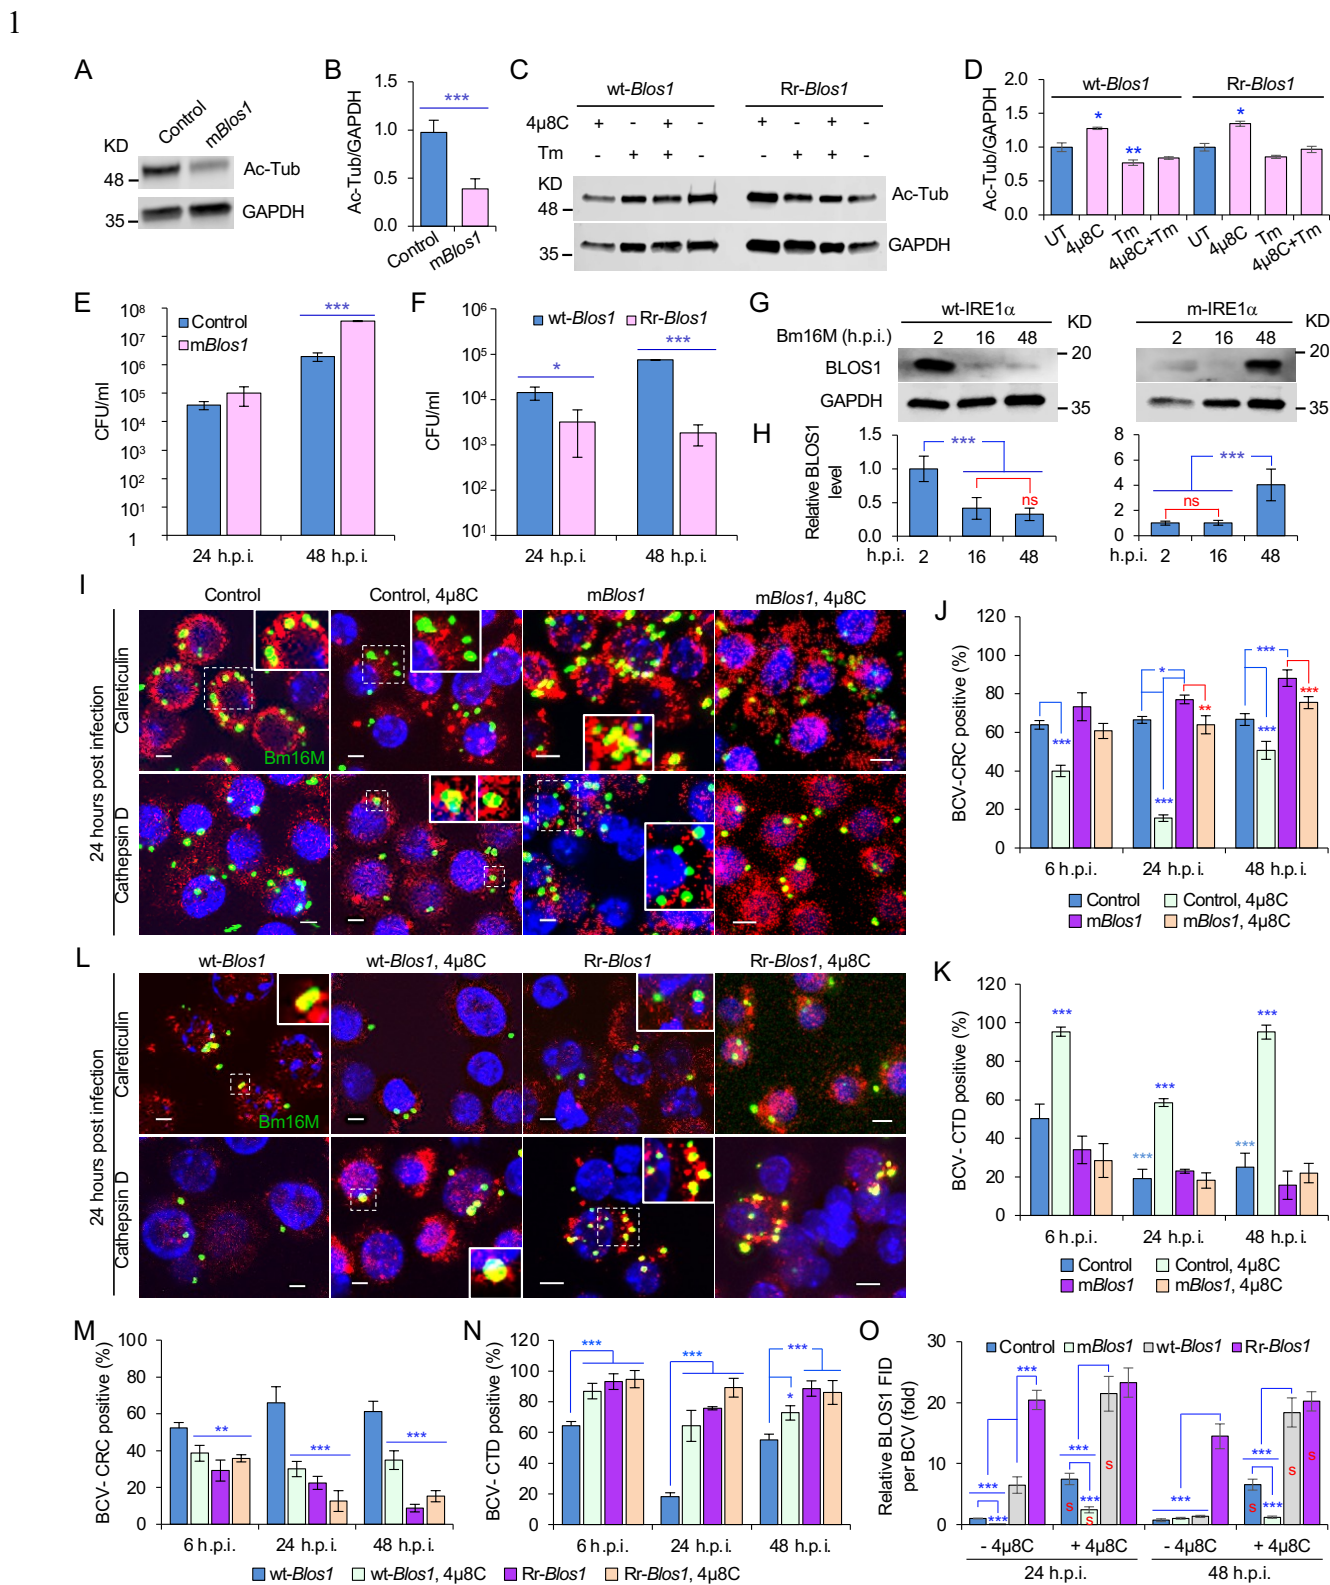

2  
3 **Figure 4. BLOS1 confers host cell susceptibility to *Brucella* infection and controls *Brucella***  
4 **intracellular trafficking.**

1 **Figure 4. BLOS1 confers host cell susceptibility to *Brucella* infection and controls *Brucella***  
2 **intracellular trafficking.** (A, B) Western blot analysis of  $\alpha$ -tubulin acetylation (A) and  
3 quantification of  $\alpha$ -tubulin acetylation level (B) in control containing Cas9 and a non-specific gRNA  
4 and the non-functional *Blos1* mutant (*mBlos1*) in RAW 264.7 Cas9 cells. Ac-Tub: anti-acetylated  
5 antibody. (C, D) Western blot analysis of  $\alpha$ -tubulin acetylation (C) and quantification of  $\alpha$ -tubulin  
6 acetylation levels (D) in control (*wt-Blos1*, overexpressing WT *Blos1*) cells and cells that express the  
7 RIDD-resistant *Blos1* variant (*Rr-Blos1*) treated or untreated with 4 $\mu$ 8C (50  $\mu$ M), Tm (5  $\mu$ g/ml), or  
8 both for 4 hr. (E-F) CFU assays for Bm16M infection of RAW264.7 cells in which *Blos1* is non-  
9 functional (E), RIDD-resistant (F) at the indicated h.p.i.. (G-H) BLOS1 degradation assay during  
10 *Brucella* infection (G) and quantification of the relative BLOS1 expression level (compared to the  
11 level of the loading control GAPDH) (H) at the indicated h.p.i.. ns: no significance. (I-K)  
12 Colocalization of BCV with calreticulin (CRC) or cathepsin D (CTD) (I) and quantification of BCV-  
13 CRC<sup>+</sup> (J) or BCV-CTD<sup>+</sup> (K) in control and *mBlos1* cells treated with or without 4 $\mu$ 8C (50  $\mu$ M) at the  
14 indicated h.p.i.. (L-N) Colocalization of BCV with CRC or CTD (L) and quantification of BCV-  
15 CRC<sup>+</sup> (M) or BCV-CTD<sup>+</sup> (N) in the *wt-Blos1* and *Rr-Blos1* cells treated with or without 4 $\mu$ 8C (50  
16  $\mu$ M) at the indicated h.p.i.. (O) Quantification of BLOS1 fluorescence integrated density (FID) per  
17 BCV in the *mBlos1*, *Rr-Blos1*, or their corresponding control cells treated with or without 4 $\mu$ 8C (50  
18  $\mu$ M) at the indicated h.p.i.. S: significance ( $p < 0.01$ ) compared to that without 4 $\mu$ 8C treatment. Host  
19 cells were infected with or without Bm16M, and at the indicated h.p.i., the cells were harvested for  
20 immunoblotting assays or fixed and subjected to confocal immunofluorescence assays. Blots/images  
21 are representative of three independent experiments. Statistical data represent the mean  $\pm$  SEM from  
22 three independent experiment. \*,  $p < 0.05$ ; \*\*,  $p < 0.01$ ; \*\*\*,  $p < 0.001$ .

23  
24 **Figure 4—figure supplement 1.** Generation of non-functional and overexpression *Blos1* variants.

25 **Figure 4—figure supplement 2.** Cells with BLOS1 deficiency or RIDD resistance differently control  
26 lysosome intracellular trafficking.

27 **Figure 4—figure supplement 3.** Host endogenous BLOS1 and the associated proteins are  
28 specifically recognized by the indicated home-made or commercial antibodies and  
29 Differential interactions of *Brucella* and host BLOS1 during infection.

1

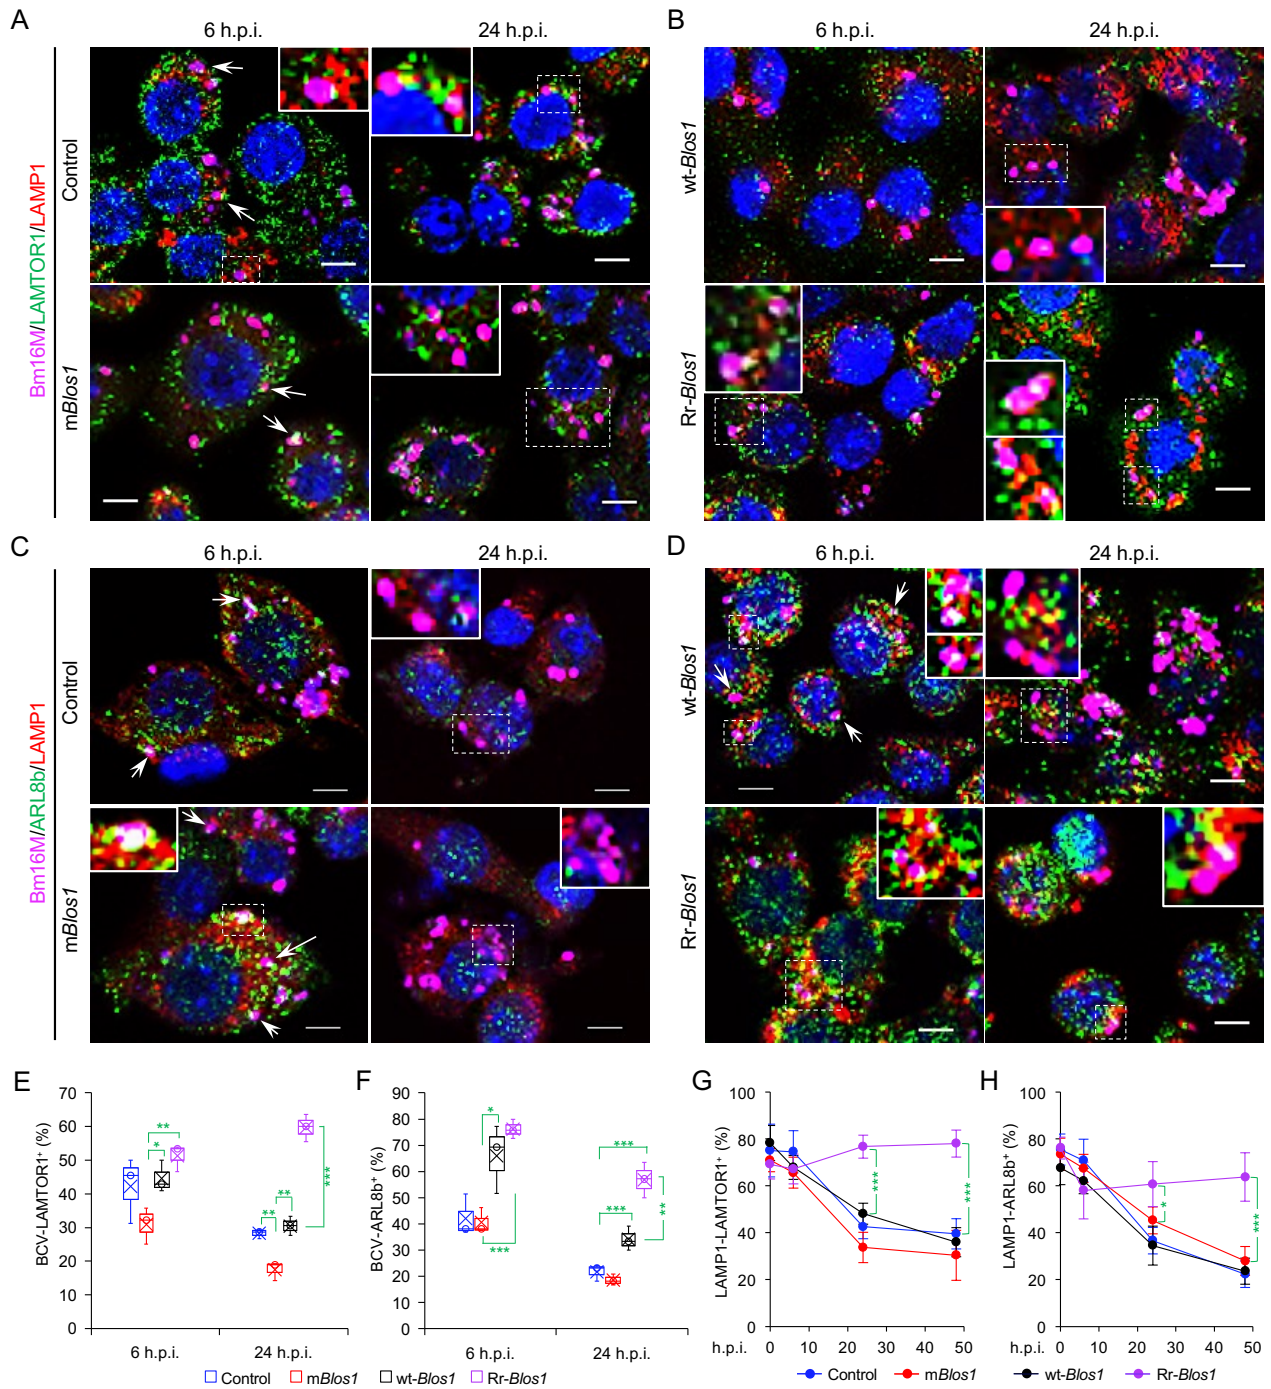

2

3

**Figure 5. *Brucella* infection dissociates host BORC-related lysosome trafficking factor LAMTOR1 and ARL8b from lysosomes.**

4

1 **Figure 5. *Brucella* infection dissociates host BORC-related lysosome trafficking factor**  
2 **LAMTOR1 and ARL8b from lysosomes.** (A, B) Colocalization of LAMTOR1 with BCVs or  
3 LAMP1 in the infected control and *mBlos1* (A), or in *wt-Blos1* and *Rr-Blos1* (B) cells at the indicated  
4 h.p.i.. (C, D) Colocalization of ARL8b with BCVs or LAMP1 in the infected control and *mBlos1* (C),  
5 or in *wt-Blos1* and *Rr-Blos1* (D) cells at the indicated h.p.i.. Arrows: colocalization of BCVs with the  
6 indicated proteins. Insets: magnification of the selected areas (within windows with dash white lines).  
7 Bars: 5  $\mu$ m. (E-F) Quantification of BCV-LAMTOR1<sup>+</sup> (E) and BCV-ARL8b<sup>+</sup> (F) in Bm16M infected  
8 cells at the indicated h.p.i. showing in (A-B) and (C-D), respectively. (G-H) Dynamics of LAMP1-  
9 LAMTOR1<sup>+</sup> (E) or LAMP1-ARL8b<sup>+</sup> (H) in a time course (48 hr) of Bm16M infection at the indicated  
10 h.p.i.. Host cells were infected with or without Bm16M, and at the indicated h.p.i., the cells were  
11 fixed and performed confocal immunofluorescence assays. Images are representative of three  
12 independent experiments. Statistical data expressed as mean  $\pm$  SEM from three independent  
13 experiments. \*,  $p < 0.05$ ; \*\*,  $p < 0.01$ ; \*\*\*,  $p < 0.001$ .

14  
15 **Figure 5—figure supplement 1.** Association of the indicated BORC-related lysosome trafficking  
16 components in the indicated uninfected-host cells.

1

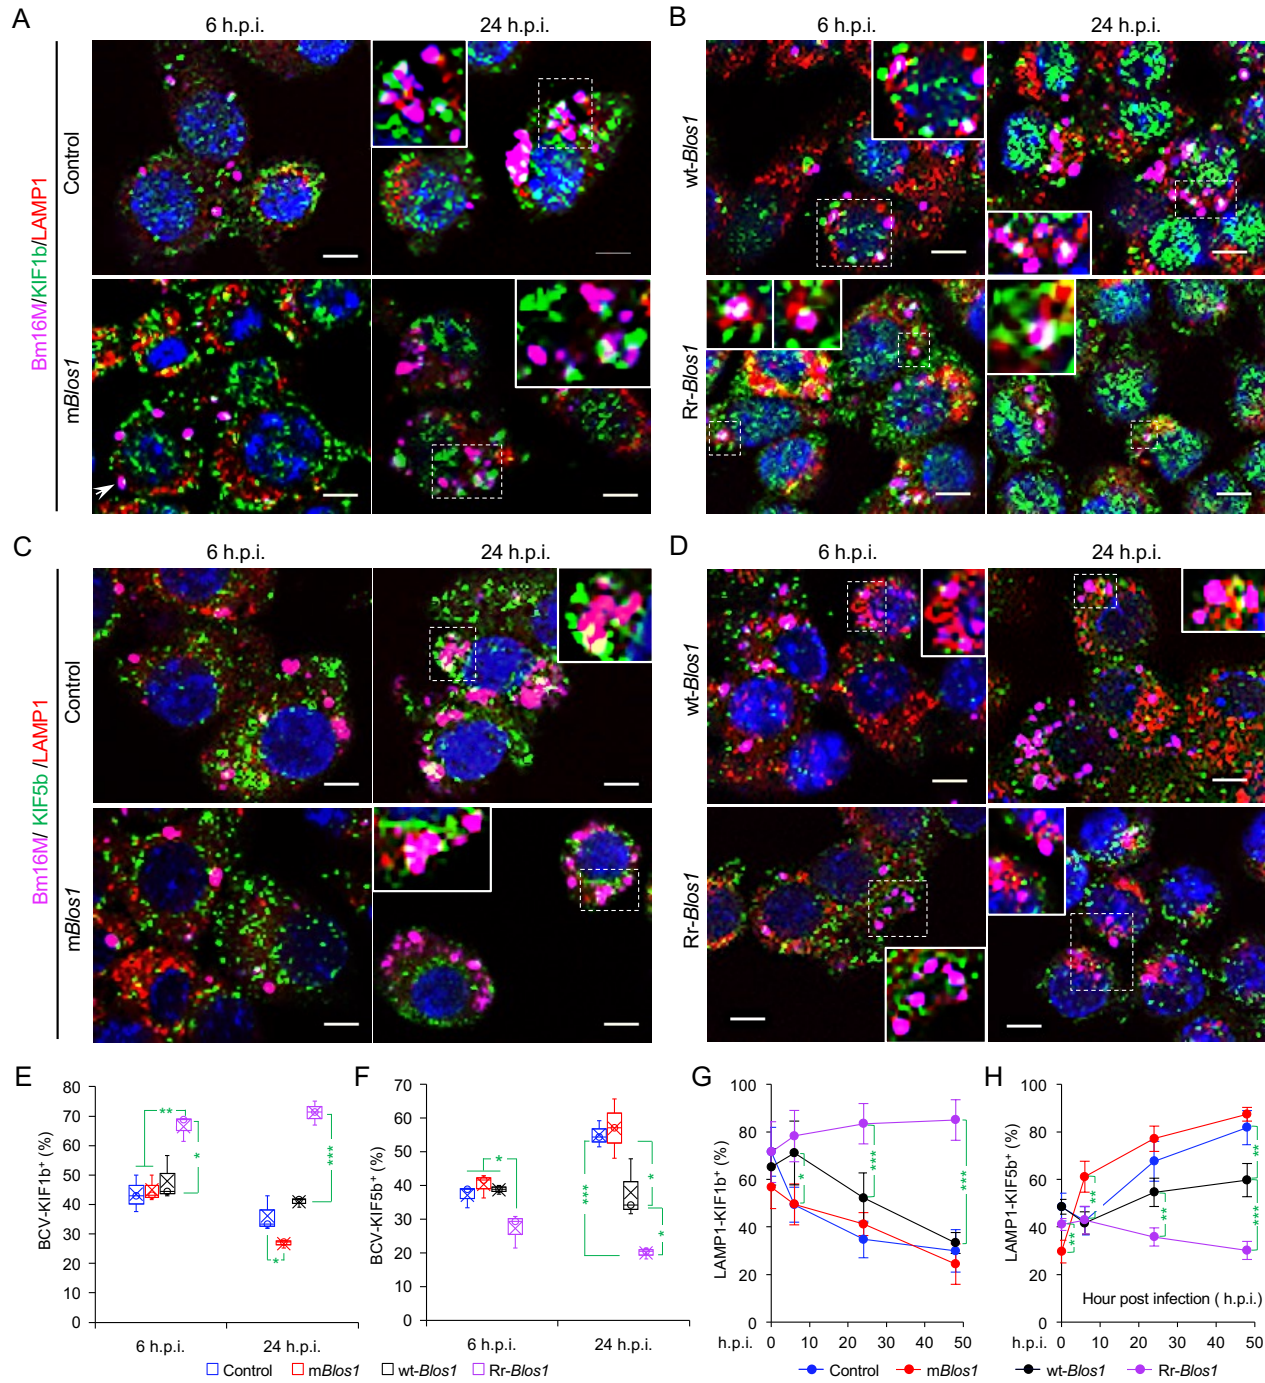

2

3

4

**Figure 6. *Brucella* infection dissociates BORG-related lysosome trafficking factor KIF1b but recruits KIF5b.**

1 **Figure 6. *Brucella* infection dissociates BORC-related lysosome trafficking factor KIF1b but**  
2 **recruits KIF5b.** (A, B) Colocalization of KIF1b with BCVs or LAMP1 in the infected control and  
3 *mBlos1* (A), or in *wt-Blos1* and *Rr-Blos1* (B) cells at the indicated h.p.i.. (C, D) Colocalization of  
4 KIF5b with BCVs or LAMP1 in the infected control and *mBlos1* (C), or in *wt-Blos1* and *Rr-Blos1*  
5 (D) cells at the indicated h.p.i.. Arrows: colocalization of BCVs with the indicated proteins. Insets:  
6 magnification of the selected areas (within windows with dash white lines). Bars: 5  $\mu$ m. (E-F)  
7 Quantification of BCV-KIF1b<sup>+</sup> (E) and BCV-KIF5b<sup>+</sup> (F) in Bm16M infected cells at the indicated  
8 h.p.i. showing in (A-B) and (C-D), respectively. (G-H) Dynamics of LAMP1-KIF1b<sup>+</sup> (G) or LAMP1-  
9 KIF5b<sup>+</sup> (H) in a time course (48 hr) of Bm16M infection at the indicated h.p.i.. Host cells were  
10 infected with or without Bm16M, and at the indicated h.p.i., the cells were fixed and subjected to  
11 confocal immunofluorescence assays. Images are representative of three independent experiments.  
12 Statistical data represent means  $\pm$  SEM from three independent experiments. \*,  $p < 0.05$ ; \*\*,  $p < 0.01$ ;  
13 \*\*\*,  $p < 0.001$ .

14  
15 **Figure 6—figure supplement 1.** Association of the BORC-related lysosome trafficking components  
16 KIF1b, KIF5b, and LAMP1 in the indicated uninfected-host cells.



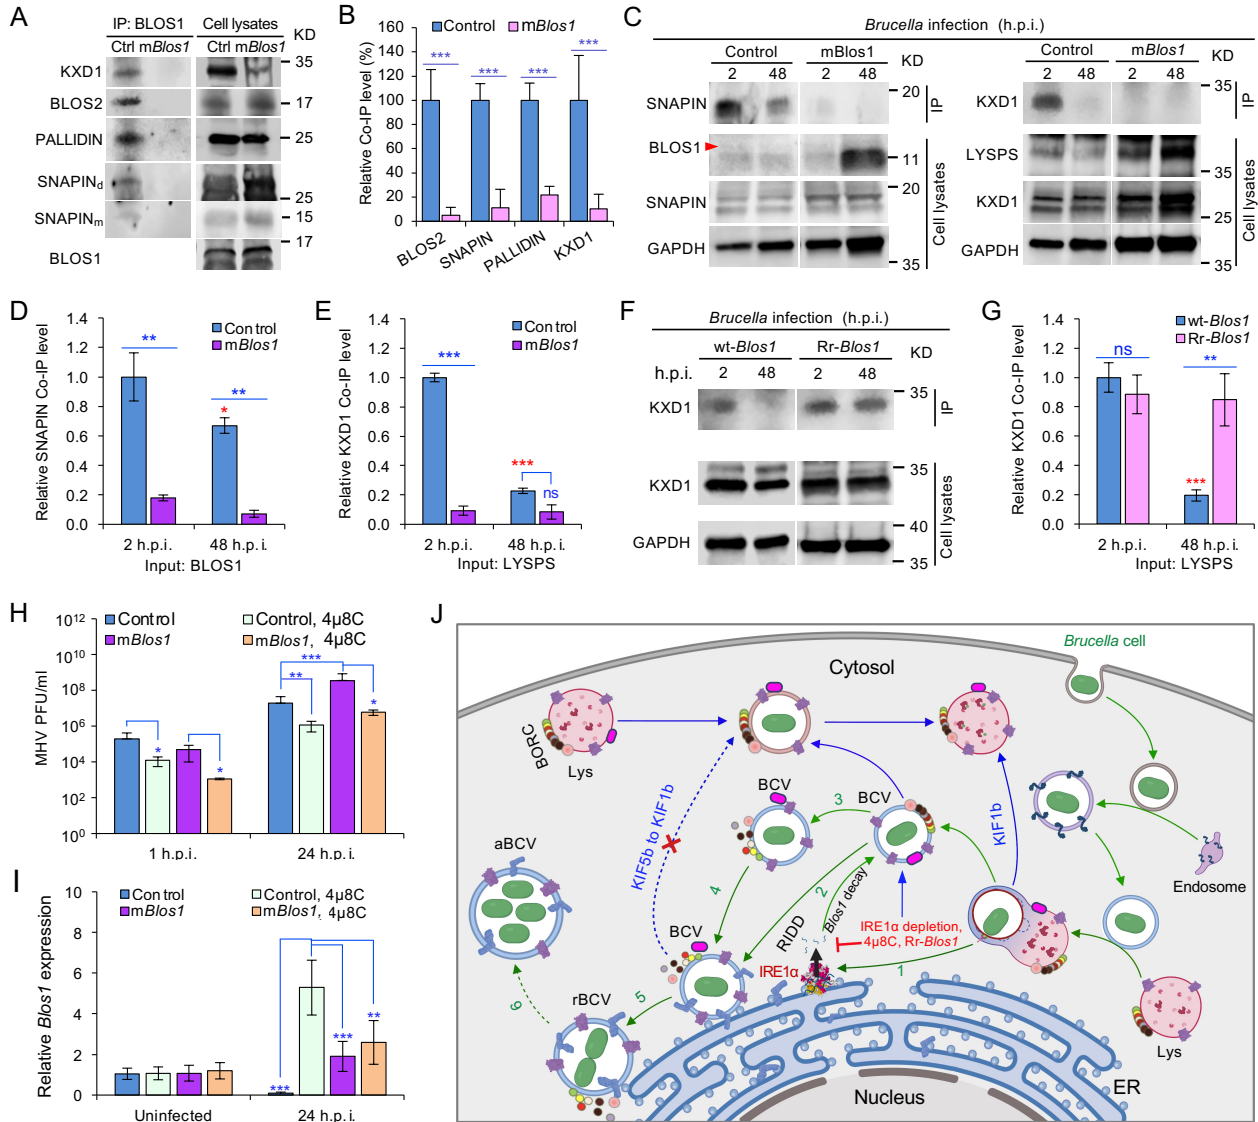

1  
2 **Figure 7. *Brucella* infection dissociates host BORC and degradation of *Blos1* mRNA supports**  
3 **coronavirus intracellular replication.**

1 **Figure 7. *Brucella* infection dissociates host BIRC and degradation of *Blos1* mRNA supports**  
2 **coronavirus intracellular replication.** (A) Co-immunoprecipitation (Co-IP) analysis of the  
3 interactions of BLOS1 with other proteins that form the BLOC-1 (BLOS1, BLOS2, SNAPIN, and  
4 PALLIDIN) or BIRC (BLOS1, BLOS2, SNAPIN, and KXD1) complex. The non-functional  
5 *mBlos1* and control cells were cultured overnight before being subjected to Co-IP assays with  
6 BLOS1 as an input. SNAPIN<sub>m</sub>: monomer SNAPIN; SNAPIN<sub>d</sub>: dimer SNAPIN. (B) Quantification  
7 of the indicated pulled-down protein levels from overnight-cultured control and *mBlos1* cell lysates  
8 using BLOS1 as an input. (C) Co-IP assays for *Brucella*-infected control and *mBlos1* cells at the  
9 indicated h.p.i. using BLOS1 (left panel) or LYSPERSIN (LYSPS, right panel) as an input. Red  
10 arrow: BLOS1. (D-E) Quantification of the indicated pulled-down protein levels of SNAPIN (D)  
11 or KXD1 (E) from *Brucella*-infected control and *mBlos1* cell lysates using BLOS1 or LYSPS as an  
12 input. (F) Co-IP assays for *Brucella*-infected wt- or Rr-*Blos1* cells at the indicated h.p.i. using  
13 LYSPERSIN as an input. (G) Quantification of the indicated pulled-down protein levels from  
14 *Brucella*-infected cell lysates of wt- or Rr-*Blos1*. (H) PFU (plaque-forming units) assay of  
15 coronavirus MHV infection of the *mBlos1* and control cells treated or untreated with 4 $\mu$ 8C (50  $\mu$ M)  
16 at the indicated h.p.i.. (I) *Blos1* mRNA expression assay of the indicated host cells infected with  
17 MHV via qRT-PCR. (J) A proposed model describing how *Brucella* subverts the host RIDD-  
18 BLOS1 pathway to support intracellular parasitism by disrupting BIRC-directed lysosomal  
19 trafficking. Green arrows: BCV trafficking to the ER compartment and replication. Blue arrows:  
20 BCV trafficking to peripheral lysosome and lysosomal degradation. Host cells were infected with  
21 or without *Brucella* or MHV, and at the indicated h.p.i., the infected or uninfected host cells were  
22 harvested for Co-IP and immunoblotting assays, or qRT-PCR assays. Blots are representative of  
23 three independent experiments. Statistical data represent the mean  $\pm$  SEM from three independent  
24 experiment. \*, p < 0.05; \*\*, p < 0.01; \*\*\*, p < 0.001. Red asterisks: Compared to the same *Brucella*  
25 infected cells at 2 h.p.i..
